# Supplementary material for: The Long-Term Cognitive and Socioeconomic Consequences of Birth Intervals: A Within-Family Sibling Comparison Using Swedish Register Data
Source: Springer Nature journal article supplement (doi:10.1007/s13524-017-0550-x), 2017-02-13
Supplement: MOESM1 [file 13524_2017_550_moesm1_esm.pdf]

# Online Resource 1

TABLE S1. Sample Exclusion Process

| Preceding Interval                 | 1960-1981 |            | 1965-1977 |            | 1982-1991 |            |
|------------------------------------|-----------|------------|-----------|------------|-----------|------------|
|                                    | N         | N excluded | N         | N excluded | N         | N excluded |
| Total born in Sweden               | 2,344,037 |            | 1,426,991 |            | 1,055,744 |            |
| ID for both parents                | 2,313,854 | 30,183     | 1,411,005 | 15,986     | 1,046,777 | 8,967      |
| All siblings born in Sweden        | 2,274,263 | 39,591     | 1,385,534 | 25,471     | 1,028,280 | 18,497     |
| No multiple births                 | 2,216,314 | 57,949     | 1,352,491 | 33,043     | 996,256   | 32,024     |
| No half-siblings                   | 1,660,306 | 556,008    | 1,012,040 | 340,451    | 694,251   | 302,005    |
| Males only                         | -         | -          | 521,558   | 490,482    | -         | -          |
| Sibling group size >2              | 716,017   | 944,289    | 299,882   | 221,676    | 329,503   | 364,748    |
| Cohort cut                         | 627,214   | 88,803     | 204,294   | 95,588     | 259,373   | 70,130     |
| No first borns                     | 449,097   | 178,117    | 74,202    | 130,092    | 186,003   | 73,370     |
| No missing values on any variables | ~430,000  | ~200,000   | 70,904    | 3,298      | 177,931   | 8,072      |
| Final                              | ~430,000  |            | 70,904    |            | 177,931   |            |
| Subsequent Interval                | 1960-1981 |            | 1965-1977 |            | 1982-1991 |            |
|                                    | N         | N excluded | N         | N excluded | N         | N excluded |
| Total born in Sweden               | 2,344,037 |            | 1,426,991 |            | 1,055,744 |            |
| ID for both parents                | 2,313,854 | 30,183     | 1,411,005 | 15,986     | 1,046,777 | 8,967      |
| All siblings born in Sweden        | 2,274,263 | 39,591     | 1,385,534 | 25,471     | 1,028,280 | 18,497     |
| No multiple births                 | 2,216,314 | 57,949     | 1,352,491 | 33,043     | 996,256   | 32,024     |
| No half-siblings                   | 1,660,306 | 556,008    | 1,012,040 | 340,451    | 694,251   | 302,005    |
| Males only                         | -         | -          | 521,558   | 490,482    | -         | -          |
| Sibling group size >2              | 716,017   | 944,289    | 299,882   | 221,676    | 329,503   | 364,748    |
| Cohort cut                         | 627,214   | 88,803     | 204,294   | 95,588     | 259,373   | 70,130     |
| No last borns                      | 455,605   | 171,609    | 81,062    | 123,232    | 201,031   | 58,342     |
| No missing values on any variables | ~430,000  | ~200,000   | 76,810    | 4,252      | 192,339   | 8,692      |
| Final                              | ~430,000  |            | 76,810    |            | 192,339   |            |

Note: Final sample for 1960-1981 cohorts varies slightly by outcome variable.

TABLE S2. Descriptive Statistics: Length of the Preceding Birth Interval in Relation to Income, Welfare Receipts, and Unemployment Averaged Over the Ages 29-31.

|            | Preceding Birth Interval   |           |        |        |        |        |        |        |        |        |        |        |        |        |        |        |          |        |        |
|------------|----------------------------|-----------|--------|--------|--------|--------|--------|--------|--------|--------|--------|--------|--------|--------|--------|--------|----------|--------|--------|
|            | 6-12                       | 13-18     | 19-24  | 25-30  | 31-36  | 37-42  | 43-48  | 49-54  | 55-60  | 61-66  | 67-72  | 73-78  | 79-84  | 85-90  | 91-96  | >96    | Everyone |        |        |
| Income     | N                          | 4633      | 37352  | 57684  | 60454  | 58269  | 46652  | 38556  | 30597  | 25640  | 20516  | 17142  | 14000  | 11876  | 9811   | 8348   | 38384    | 479914 |        |
|            | Mean income                | 1446.8    | 1519.0 | 1605.9 | 1634.0 | 1650.8 | 1648.3 | 1630.4 | 1622.4 | 1619.8 | 1612.8 | 1602.1 | 1622.3 | 1584.8 | 1605.6 | 1586.5 | 1556.3   | 1610.3 |        |
|            | Female                     | 47.7      | 48.2   | 48.2   | 48.5   | 48.1   | 48.2   | 48.6   | 47.6   | 48.6   | 49.1   | 49.3   | 48.2   | 48.3   | 48.7   | 49.5   | 48.3     | 48.4   |        |
|            | Birth order                | Mean      | 2.7    | 2.7    | 2.6    | 2.6    | 2.6    | 2.7    | 2.8    | 2.9    | 3.0    | 3.1    | 3.2    | 3.2    | 3.2    | 3.2    | 3.3      | 3.3    | 2.9    |
|            | Maternal age               | Mean      | 25.0   | 26.4   | 27.0   | 27.3   | 27.9   | 28.5   | 29.2   | 29.9   | 30.7   | 31.4   | 31.9   | 32.5   | 33.0   | 33.5   | 34.1     | 36.4   | 29.5   |
|            | Birth year                 | Mean      | 1967.9 | 1968.2 | 1969.2 | 1969.6 | 1969.8 | 1969.8 | 1969.8 | 1969.8 | 1969.8 | 1969.7 | 1969.6 | 1969.6 | 1969.6 | 1969.6 | 1969.3   | 1968.7 | 1969.4 |
|            | Sibling group size         | Mean      | 3.9    | 3.9    | 3.7    | 3.6    | 3.5    | 3.5    | 3.5    | 3.5    | 3.5    | 3.5    | 3.5    | 3.5    | 3.5    | 3.5    | 3.5      | 3.5    | 3.6    |
|            | Income by birth year       | 1960-1964 | 1440.0 | 1428.4 | 1456.4 | 1492.3 | 1482.4 | 1451.3 | 1498.5 | 1474.3 | 1478.3 | 1478.6 | 1440.9 | 1483.8 | 1513.4 | 1493.6 | 1448.7   | 1509.9 | 1473.7 |
|            |                            | 1965-1969 | 1277.4 | 1302.6 | 1371.3 | 1350.2 | 1350.4 | 1350.6 | 1304.7 | 1348.2 | 1328.3 | 1355.3 | 1306.5 | 1321.5 | 1311.2 | 1330.9 | 1354.0   | 1352.7 | 1340.0 |
|            |                            | 1970-1974 | 1557.6 | 1661.3 | 1669.5 | 1686.6 | 1756.4 | 1725.3 | 1726.2 | 1662.4 | 1688.4 | 1688.2 | 1643.8 | 1669.1 | 1600.1 | 1677.4 | 1625.7   | 1657.0 | 1689.4 |
|            | 1975-1979                  | 1723.7    | 1746.2 | 1824.6 | 1837.9 | 1859.8 | 1842.1 | 1815.1 | 1778.3 | 1757.4 | 1858.1 | 1787.3 | 1805.0 | 1752.9 | 1807.6 | 1788.8 | 1761.7   | 1812.4 |        |
|            | 1980-1981                  | 1724.3    | 1911.9 | 1987.4 | 2031.0 | 1998.2 | 2020.0 | 2018.9 | 1996.3 | 2021.7 | 1966.6 | 2004.2 | 2015.6 | 1999.6 | 1983.6 | 1974.5 | 1936.6   | 1993.7 |        |
| Welfare    | N                          | 4957      | 39684  | 60870  | 63376  | 61009  | 48811  | 40341  | 31949  | 26670  | 21383  | 17821  | 14513  | 12304  | 10180  | 8661   | 39606    | 502135 |        |
|            | % Receiving welfare        | 11.9      | 9.1    | 7.4    | 6.8    | 6.3    | 6.1    | 6.2    | 6.5    | 6.4    | 6.3    | 6.3    | 6.1    | 5.9    | 6.4    | 6.5    | 6.9      | 6.8    |        |
|            | Female                     | 48.0      | 48.4   | 48.4   | 48.7   | 48.3   | 48.3   | 48.7   | 47.7   | 48.7   | 49.1   | 49.3   | 48.3   | 48.4   | 48.7   | 49.6   | 48.4     | 48.5   |        |
|            | Birth order                | Mean      | 2.7    | 2.7    | 2.6    | 2.6    | 2.6    | 2.7    | 2.8    | 2.9    | 3.0    | 3.1    | 3.2    | 3.2    | 3.2    | 3.3    | 3.3      | 3.3    | 2.8    |
|            | Maternal age               | Mean      | 25.0   | 26.4   | 27.0   | 27.3   | 27.9   | 28.5   | 29.3   | 30.0   | 30.7   | 31.4   | 31.9   | 32.5   | 33.1   | 34.1   | 36.4     | 29.5   |        |
|            | Birth year                 | Mean      | 1968.0 | 1968.3 | 1969.2 | 1969.7 | 1969.9 | 1969.9 | 1969.8 | 1969.8 | 1969.8 | 1969.7 | 1969.7 | 1969.7 | 1969.6 | 1969.7 | 1969.3   | 1968.7 | 1969.5 |
|            | Sibling group size         | Mean      | 3.9    | 3.9    | 3.7    | 3.6    | 3.5    | 3.5    | 3.5    | 3.5    | 3.5    | 3.5    | 3.5    | 3.5    | 3.5    | 3.5    | 3.5      | 3.5    | 3.6    |
|            | Welfare by birth year      | 1960-1964 | 17.2   | 11.4   | 9.8    | 9.6    | 10.0   | 9.0    | 8.1    | 8.9    | 7.7    | 8.2    | 8.9    | 7.3    | 7.2    | 7.4    | 9.2      | 8.0    | 9.2    |
|            |                            | 1965-1969 | 14.7   | 12.2   | 9.9    | 10.2   | 10.2   | 9.3    | 9.0    | 9.9    | 10.3   | 8.6    | 9.2    | 11.0   | 10.3   | 9.4    | 8.2      | 10.5   | 10.1   |
|            |                            | 1970-1974 | 5.9    | 6.5    | 5.2    | 5.1    | 4.9    | 5.2    | 4.8    | 4.9    | 4.6    | 5.0    | 4.6    | 5.8    | 4.5    | 5.1    | 4.1      | 6.1    | 5.2    |
|            | 1975-1979                  | 6.2       | 5.6    | 4.6    | 4.1    | 3.3    | 3.6    | 2.9    | 4.0    | 3.5    | 4.1    | 4.3    | 2.6    | 4.0    | 3.5    | 7.1    | 4.5      | 4.0    |        |
|            | 1980-1981                  | 7.5       | 5.0    | 3.6    | 3.6    | 3.9    | 3.4    | 3.5    | 3.9    | 3.6    | 4.2    | 3.5    | 3.4    | 2.6    | 3.3    | 4.0    | 4.3      | 3.8    |        |
| Unemployed | N                          | 4957      | 39684  | 60870  | 63376  | 61009  | 48811  | 40341  | 31949  | 26670  | 21383  | 17821  | 14513  | 12304  | 10180  | 8661   | 39606    | 502135 |        |
|            | % Unemployed               | 28.3      | 26.1   | 24.5   | 24.1   | 23.7   | 24     | 24.1   | 24.3   | 24.7   | 24.5   | 24.6   | 23.6   | 25     | 23.7   | 25.3   | 25       | 24.5   |        |
|            | Female                     | 48.0      | 48.4   | 48.4   | 48.7   | 48.3   | 48.3   | 48.7   | 47.7   | 48.7   | 49.1   | 49.3   | 48.3   | 48.4   | 48.7   | 49.6   | 48.4     | 48.5   |        |
|            | Birth order                | Mean      | 2.7    | 2.7    | 2.6    | 2.6    | 2.6    | 2.7    | 2.8    | 2.9    | 3.0    | 3.1    | 3.2    | 3.2    | 3.2    | 3.3    | 3.3      | 3.3    | 2.8    |
|            | Maternal age               | Mean      | 25.0   | 26.4   | 27.0   | 27.3   | 27.9   | 28.5   | 29.3   | 30.0   | 30.7   | 31.4   | 31.9   | 32.5   | 33.1   | 34.1   | 36.4     | 29.5   |        |
|            | Birth year                 | Mean      | 1968.0 | 1968.3 | 1969.2 | 1969.7 | 1969.9 | 1969.9 | 1969.8 | 1969.8 | 1969.8 | 1969.7 | 1969.7 | 1969.7 | 1969.6 | 1969.7 | 1969.3   | 1968.7 | 1969.5 |
|            | Sibling group size         | Mean      | 3.9    | 3.9    | 3.7    | 3.6    | 3.5    | 3.5    | 3.5    | 3.5    | 3.5    | 3.5    | 3.5    | 3.5    | 3.5    | 3.5    | 3.5      | 3.5    | 3.6    |
|            | Unemployment by birth year | 1960-1964 | 13.7   | 13.3   | 12.2   | 12.4   | 12.1   | 11.1   | 11.7   | 12.9   | 11.9   | 10.5   | 12.0   | 11.4   | 13.7   | 11.0   | 11.8     | 11.2   | 12.0   |
|            |                            | 1965-1969 | 39.6   | 34.8   | 33.0   | 33.3   | 33.5   | 33.0   | 32.1   | 32.2   | 34.0   | 33.0   | 33.1   | 33.9   | 35.3   | 32.5   | 32.8     | 32.4   | 33.3   |
|            |                            | 1970-1974 | 28.6   | 26.5   | 25.6   | 26.8   | 25.2   | 26.3   | 27.9   | 28.1   | 27.6   | 25.7   | 28.6   | 26.5   | 29.1   | 27.4   | 36.1     | 28.8   | 27.0   |
|            | 1975-1979                  | 21.7      | 23.3   | 24.0   | 22.7   | 23.5   | 22.8   | 23.6   | 22.7   | 24.6   | 25.0   | 24.2   | 22.5   | 24.4   | 25.1   | 25.5   | 22.8     | 23.5   |        |
|            | 1980-1981                  | 17.1      | 12.9   | 13.3   | 13.1   | 13.4   | 13.7   | 13.9   | 12.8   | 14.5   | 14.2   | 13.6   | 13.2   | 14.5   | 14.7   | 13.9   | 13.6     | 13.6   |        |

TABLE S3. Descriptive Statistics: Length of the Preceding Birth Interval in Relation to High School GPA at Age 16, Cognitive Ability at Ages 17-20, and Years of Education at Age 30.

|                   |                        | Preceding Birth Interval |        |        |        |        |        |        |        |        |        |        |        |        |        | Everyone |        |         |         |        |
|-------------------|------------------------|--------------------------|--------|--------|--------|--------|--------|--------|--------|--------|--------|--------|--------|--------|--------|----------|--------|---------|---------|--------|
|                   |                        | 6-12                     | 13-18  | 19-24  | 25-30  | 31-36  | 37-42  | 43-48  | 49-54  | 55-60  | 61-66  | 67-72  | 73-78  | 79-84  | 85-90  |          | 91-96  | >96     |         |        |
| GPA               | N                      | 1204                     | 17,794 | 35,577 | 31,838 | 24,506 | 17,696 | 13,177 | 9,488  | 7,294  | 5,265  | 3,951  | 2,917  | 2,113  | 1,525  | 1,062    | 2,524  | 177,931 |         |        |
|                   | Mean                   | 183.2                    | 204.7  | 210.4  | 210.7  | 208.5  | 207.0  | 207.5  | 207.0  | 206.6  | 205.3  | 204.8  | 205.9  | 205.1  | 207.3  | 203.9    | 200.8  | 207.9   | 207.9   |        |
|                   | %                      | 45.4                     | 48.3   | 48.1   | 48.1   | 47.9   | 47.4   | 48.1   | 48.4   | 48.6   | 48.8   | 48.7   | 48.2   | 47.0   | 50.0   | 51.9     | 47.9   | 48.1    | 48.1    |        |
|                   | Mean                   | 2.5                      | 2.5    | 2.5    | 2.5    | 2.6    | 2.6    | 2.7    | 2.8    | 2.9    | 2.9    | 2.9    | 3.0    | 3.0    | 3.0    | 3.0      | 2.8    | 2.6     | 2.6     |        |
|                   | Mean                   | 26.1                     | 27.6   | 28.2   | 28.5   | 28.9   | 29.5   | 30.1   | 30.7   | 31.2   | 31.7   | 32.2   | 32.6   | 33.0   | 33.2   | 33.2     | 33.9   | 29.3    | 29.3    |        |
|                   | Mean                   | 1987.1                   | 1987.3 | 1987.3 | 1987.3 | 1986.9 | 1987.0 | 1987.2 | 1987.5 | 1987.7 | 1987.9 | 1988.0 | 1988.0 | 1988.1 | 1988.2 | 1988.0   | 1986.8 | 1987.3  | 1987.3  |        |
|                   | Mean                   | 3.8                      | 3.7    | 3.5    | 3.5    | 3.4    | 3.4    | 3.4    | 3.4    | 3.5    | 3.5    | 3.5    | 3.5    | 3.5    | 3.5    | 3.6      | 3.7    | 3.5     | 3.5     |        |
|                   | 1982-1984              | 177.4                    | 202.5  | 209.4  | 208.4  | 206.9  | 205.9  | 204.2  | 202.3  | 200.2  | 194.6  | 195.8  | 194.9  | 201.3  | 202.0  | 202.0    | 193.4  | 197.2   | 205.3   | 205.3  |
|                   | 1985-1989              | 183.6                    | 205.4  | 210.4  | 210.5  | 209.0  | 207.6  | 208.8  | 207.7  | 207.2  | 205.7  | 206.2  | 205.4  | 201.4  | 206.9  | 200.9    | 199.4  | 208.3   | 208.3   | 208.3  |
|                   | 1990-1991              | 187.5                    | 204.8  | 211.1  | 212.7  | 208.7  | 206.4  | 207.1  | 208.7  | 208.9  | 209.3  | 206.7  | 210.7  | 210.7  | 209.6  | 209.6    | 206.4  | 209.1   | 209.1   | 209.1  |
| Cognitive ability | N                      | 960                      | 6,884  | 10,519 | 11,013 | 10,189 | 7,770  | 5,945  | 4,406  | 3,419  | 2,510  | 1,866  | 1,463  | 1,128  | 824    | 578      | 1,430  | 70,904  |         |        |
|                   | Mean                   | 4.7                      | 5.0    | 5.2    | 5.2    | 5.1    | 5.1    | 5.0    | 4.9    | 4.9    | 4.9    | 4.9    | 4.8    | 4.9    | 4.9    | 4.9      | 4.9    | 5.1     | 5.1     |        |
|                   | Mean                   | 2.6                      | 2.6    | 2.5    | 2.5    | 2.5    | 2.6    | 2.7    | 2.8    | 2.9    | 3.0    | 3.0    | 3.0    | 3.1    | 3.1    | 3.1      | 3.1    | 2.7     | 2.7     |        |
|                   | Mean                   | 24.9                     | 26.2   | 26.6   | 26.8   | 27.3   | 27.9   | 28.4   | 29.2   | 29.8   | 30.4   | 30.7   | 31.1   | 31.6   | 32.1   | 32.5     | 33.9   | 28.0    | 28.0    |        |
|                   | Mean                   | 1969.8                   | 1970.0 | 1970.5 | 1971.0 | 1971.2 | 1971.5 | 1971.7 | 1972.0 | 1972.2 | 1972.5 | 1972.8 | 1973.1 | 1973.2 | 1973.4 | 1973.6   | 1973.5 | 1973.5  | 1971.4  | 1971.4 |
|                   | Mean                   | 3.8                      | 3.8    | 3.6    | 3.5    | 3.4    | 3.4    | 3.4    | 3.5    | 3.5    | 3.5    | 3.5    | 3.4    | 3.4    | 3.4    | 3.4      | 3.5    | 3.5     | 3.5     |        |
|                   | 1965-1969              | 4.6                      | 4.9    | 5.2    | 5.2    | 5.2    | 5.1    | 5.1    | 5.0    | 4.9    | 5.1    | 4.8    | 4.9    | 5.3    | 5.0    | 4.7      | 5.0    | 5.1     | 5.1     |        |
|                   | 1970-1974              | 4.8                      | 5.1    | 5.2    | 5.1    | 5.1    | 5.0    | 4.9    | 4.9    | 4.9    | 4.8    | 4.9    | 4.7    | 4.7    | 4.9    | 4.8      | 5.0    | 5.0     | 5.0     |        |
|                   | 1975-1977              | 4.5                      | 5.3    | 5.3    | 5.3    | 5.1    | 5.1    | 5.1    | 5.0    | 5.1    | 5.0    | 4.8    | 4.9    | 4.9    | 4.9    | 5.0      | 4.9    | 5.1     | 5.1     |        |
|                   | Educational attainment | N                        | 4,579  | 36,211 | 55,068 | 56,980 | 54,579 | 42,901 | 34,504 | 26,471 | 21,402 | 16,229 | 13,001 | 10,075 | 8,045  | 6,377    | 5,006  | 16,575  | 408,003 |        |
| Mean              |                        | 11.7                     | 12.2   | 12.5   | 12.5   | 12.6   | 12.5   | 12.5   | 12.5   | 12.5   | 12.5   | 12.4   | 12.5   | 12.5   | 12.5   | 12.6     | 12.6   | 12.5    | 12.5    |        |
| %                 |                        | 47.5                     | 48.3   | 48.2   | 48.5   | 48.1   | 48.3   | 48.7   | 47.7   | 48.6   | 49.1   | 49.3   | 48.4   | 48.1   | 48.6   | 49.9     | 48.4   | 48.4    | 48.4    |        |
| Mean              |                        | 2.7                      | 2.7    | 2.6    | 2.6    | 2.6    | 2.7    | 2.8    | 2.9    | 3.0    | 3.0    | 3.1    | 3.1    | 3.1    | 3.1    | 3.2      | 3.2    | 2.8     | 2.8     |        |
| Mean              |                        | 24.9                     | 26.3   | 26.9   | 27.2   | 27.7   | 28.3   | 28.9   | 29.6   | 30.3   | 30.8   | 31.3   | 31.9   | 32.4   | 32.8   | 33.2     | 34.8   | 28.6    | 28.6    |        |
| Mean              |                        | 1967.7                   | 1968.0 | 1968.9 | 1969.4 | 1969.8 | 1969.9 | 1970.0 | 1970.3 | 1970.5 | 1970.8 | 1971.0 | 1971.4 | 1971.6 | 1972.0 | 1972.0   | 1972.8 | 1969.9  | 1969.9  |        |
| Mean              |                        | 3.8                      | 3.8    | 3.7    | 3.6    | 3.5    | 3.5    | 3.5    | 3.5    | 3.5    | 3.5    | 3.5    | 3.5    | 3.5    | 3.5    | 3.5      | 3.5    | 3.5     | 3.5     |        |
| 1960-1964         |                        | 11.2                     | 11.5   | 11.7   | 11.8   | 11.9   | 11.8   | 11.7   | 11.7   | 11.7   | 11.6   | 11.7   | 11.5   | 11.5   | 11.7   | 11.5     | 11.7   | 11.7    | 11.7    |        |
| 1965-1969         |                        | 11.4                     | 11.8   | 12.0   | 12.1   | 12.1   | 12.1   | 12.0   | 12.0   | 11.9   | 11.9   | 11.9   | 11.9   | 11.9   | 12.0   | 11.9     | 11.9   | 12.0    | 12.0    |        |
| 1970-1974         |                        | 12.3                     | 12.8   | 12.9   | 12.9   | 12.8   | 12.7   | 12.6   | 12.5   | 12.5   | 12.5   | 12.5   | 12.5   | 12.5   | 12.5   | 12.5     | 12.5   | 12.7    | 12.7    |        |
| 1975-1979         | 12.5                   | 13.4                     | 13.5   | 13.5   | 13.5   | 13.5   | 13.4   | 13.3   | 13.3   | 13.4   | 13.2   | 13.2   | 13.1   | 13.1   | 13.2   | 13.1     | 13.4   | 13.4    |         |        |
| 1980-1981         | 12.5                   | 13.4                     | 13.7   | 13.7   | 13.7   | 13.6   | 13.5   | 13.5   | 13.6   | 13.4   | 13.6   | 13.5   | 13.6   | 13.7   | 13.4   | 13.4     | 13.6   | 13.6    |         |        |

TABLE S4. Descriptive Statistics: Length of the Subsequent Birth Interval in Relation to Income, Welfare Receipts, and Unemployment Averaged Over the Ages 29-31.

|                     | Subsequent Birth Interval |           |        |        |        |        |        |        |        |        |        |        |        |        |        |        |          |        |        |
|---------------------|---------------------------|-----------|--------|--------|--------|--------|--------|--------|--------|--------|--------|--------|--------|--------|--------|--------|----------|--------|--------|
|                     | 6-12                      | 13-18     | 19-24  | 25-30  | 31-36  | 37-42  | 43-48  | 49-54  | 55-60  | 61-66  | 67-72  | 73-78  | 79-84  | 85-90  | 91-96  | >96    | Everyone |        |        |
| Income (not logged) | N                         | 4456      | 35490  | 56079  | 58783  | 56855  | 45196  | 36933  | 28962  | 24205  | 19042  | 15649  | 12653  | 10667  | 8606   | 7088   | 29612    | 450276 |        |
|                     | Mean income               | 1420.7    | 1547.9 | 1634.8 | 1672.0 | 1697.7 | 1670.7 | 1692.9 | 1664.3 | 1672.9 | 1679.4 | 1663.2 | 1672.7 | 1664.6 | 1660.8 | 1667.3 | 1643.1   | 1657.1 | 1657.1 |
|                     | Female %                  | 48.4      | 48.3   | 48.2   | 48.6   | 48.1   | 48.4   | 48.1   | 48.3   | 47.7   | 47.4   | 48.5   | 47.3   | 47.1   | 49.2   | 47.6   | 47.4     | 47.4   | 48.1   |
|                     | Birth order               | Mean      | 1.7    | 1.7    | 1.6    | 1.6    | 1.6    | 1.7    | 1.8    | 1.9    | 2.0    | 2.1    | 2.1    | 2.1    | 2.2    | 2.2    | 2.2      | 2.2    | 1.8    |
|                     | Maternal age              | Mean      | 24.0   | 25.1   | 25.2   | 25.0   | 25.0   | 25.2   | 25.4   | 25.6   | 25.8   | 25.9   | 25.9   | 26.0   | 25.9   | 25.8   | 25.8     | 25.3   | 25.3   |
|                     | Birth year                | Mean      | 1967.7 | 1968.2 | 1969.3 | 1969.7 | 1969.9 | 1969.9 | 1970.0 | 1969.9 | 1970.0 | 1970.2 | 1970.2 | 1970.3 | 1970.4 | 1970.4 | 1970.5   | 1970.7 | 1969.8 |
|                     | Sibling group size        | Mean      | 3.9    | 3.8    | 3.6    | 3.5    | 3.5    | 3.4    | 3.4    | 3.4    | 3.4    | 3.4    | 3.4    | 3.4    | 3.4    | 3.4    | 3.4      | 3.4    | 3.5    |
|                     | Income by birth year      | 1960-1964 | 1414.3 | 1447.5 | 1477.9 | 1500.8 | 1555.3 | 1505.7 | 1512.6 | 1492.7 | 1503.6 | 1473.1 | 1474.2 | 1525.5 | 1538.1 | 1518.7 | 1510.4   | 1481.2 | 1497.9 |
|                     |                           | 1965-1969 | 1232.3 | 1349.5 | 1384.0 | 1373.2 | 1401.5 | 1349.2 | 1384.2 | 1363.3 | 1423.0 | 1417.8 | 1357.6 | 1323.2 | 1332.8 | 1415.7 | 1368.8   | 1335.6 | 1371.3 |
|                     |                           | 1970-1974 | 1545.3 | 1739.9 | 1739.4 | 1805.9 | 1771.2 | 1716.6 | 1757.1 | 1746.7 | 1697.8 | 1722.7 | 1664.5 | 1761.1 | 1730.5 | 1648.0 | 1693.7   | 1705.9 | 1740.4 |
|                     | 1975-1979                 | 1496.9    | 1806.7 | 1864.4 | 1914.0 | 1900.8 | 1876.0 | 1889.9 | 1945.6 | 1864.4 | 1879.2 | 1865.7 | 1779.7 | 1831.4 | 1884.9 | 1879.1 | 1784.6   | 1870.8 |        |
|                     | 1980-1981                 | 1623.8    | 1895.1 | 2034.7 | 2007.3 | 2061.8 | 1997.7 | 2028.9 | 2051.7 | 2029.5 | 2023.3 | 2045.0 | 2019.3 | 1955.9 | 2072.1 | 2001.9 | 1960.0   | 2014.3 |        |
| Welfare support     | N                         | 4773      | 37707  | 59359  | 61862  | 59679  | 47373  | 38663  | 30336  | 25292  | 19904  | 16371  | 13188  | 11157  | 8969   | 7385   | 30886    | 472904 |        |
|                     | % Receiving welfare       | 11.8      | 8.9    | 7.2    | 6.5    | 6.0    | 6.1    | 6.2    | 6.3    | 6.4    | 6.1    | 6.4    | 6.5    | 6.1    | 6.7    | 6.7    | 6.8      | 6.7    |        |
|                     | Female %                  | 48.3      | 48.5   | 48.2   | 48.7   | 48.2   | 48.5   | 48.2   | 48.5   | 47.9   | 47.4   | 48.7   | 47.6   | 47.3   | 49.4   | 47.8   | 47.5     | 48.2   |        |
|                     | Birth order               | Mean      | 1.7    | 1.7    | 1.6    | 1.6    | 1.6    | 1.7    | 1.8    | 1.9    | 2.0    | 2.1    | 2.1    | 2.1    | 2.2    | 2.2    | 2.2      | 2.2    | 1.8    |
|                     | Maternal age              | Mean      | 24.0   | 25.1   | 25.2   | 25.0   | 25.0   | 25.2   | 25.4   | 25.6   | 25.8   | 26.0   | 25.9   | 26.0   | 25.9   | 25.8   | 25.8     | 25.3   | 25.3   |
|                     | Birth year                | Mean      | 1967.7 | 1968.3 | 1969.4 | 1969.7 | 1970.0 | 1970.0 | 1970.0 | 1970.0 | 1970.1 | 1970.3 | 1970.3 | 1970.4 | 1970.5 | 1970.5 | 1970.6   | 1970.7 | 1969.8 |
|                     | Sibling group size        | Mean      | 3.9    | 3.8    | 3.6    | 3.5    | 3.4    | 3.4    | 3.4    | 3.4    | 3.4    | 3.4    | 3.4    | 3.4    | 3.4    | 3.4    | 3.4      | 3.4    | 3.5    |
|                     | Income by birth year      | 1960-1964 | 15.8   | 11.3   | 10.2   | 8.4    | 8.5    | 8.2    | 8.4    | 9.0    | 9.5    | 8.2    | 8.4    | 7.1    | 8.3    | 10.1   | 6.3      | 8.2    | 9.0    |
|                     |                           | 1965-1969 | 13.8   | 11.7   | 9.6    | 10.0   | 8.7    | 10.0   | 10.3   | 8.3    | 9.7    | 9.0    | 9.3    | 11.9   | 11.5   | 11.1   | 8.6      | 10.0   | 10.0   |
|                     |                           | 1970-1974 | 9.3    | 6.3    | 4.3    | 4.2    | 4.5    | 4.2    | 5.3    | 4.7    | 7.1    | 4.9    | 5.8    | 4.6    | 4.6    | 3.3    | 6.7      | 6.1    | 5.0    |
|                     | 1975-1979                 | 12.5      | 4.9    | 4.0    | 3.5    | 3.1    | 4.4    | 4.2    | 3.6    | 3.4    | 4.2    | 3.9    | 4.4    | 3.7    | 4.1    | 4.7    | 4.2      | 3.9    |        |
|                     | 1980-1981                 | 8.9       | 5.8    | 3.7    | 3.3    | 3.3    | 3.6    | 3.6    | 3.4    | 3.7    | 4.0    | 4.3    | 3.6    | 4.3    | 4.1    | 4.1    | 6.2      | 3.9    |        |
| Unemployed          | N                         | 4773      | 37707  | 59359  | 61862  | 59679  | 47373  | 38663  | 30336  | 25292  | 19904  | 16371  | 13188  | 11157  | 8969   | 7385   | 30886    | 472904 |        |
|                     | % Unemployed              | 27.5      | 24.5   | 23     | 22.6   | 22     | 22.7   | 22.9   | 22.8   | 23.6   | 23.1   | 23     | 23.5   | 23.8   | 24.8   | 23.8   | 24.9     | 23.2   |        |
|                     | Female %                  | 48.3      | 48.5   | 48.2   | 48.7   | 48.5   | 48.5   | 48.2   | 48.5   | 47.9   | 47.4   | 48.7   | 47.6   | 47.3   | 49.4   | 47.8   | 47.5     | 48.2   |        |
|                     | Birth order               | Mean      | 1.7    | 1.7    | 1.6    | 1.6    | 1.6    | 1.7    | 1.8    | 1.9    | 2.0    | 2.1    | 2.1    | 2.1    | 2.2    | 2.2    | 2.2      | 2.2    | 1.8    |
|                     | Maternal age              | Mean      | 24.0   | 25.1   | 25.2   | 25.0   | 25.0   | 25.2   | 25.4   | 25.6   | 25.8   | 26.0   | 25.9   | 26.0   | 25.9   | 25.8   | 25.8     | 25.3   | 25.3   |
|                     | Birth year                | Mean      | 1967.7 | 1968.3 | 1969.4 | 1969.7 | 1970.0 | 1970.0 | 1970.0 | 1970.0 | 1970.1 | 1970.3 | 1970.3 | 1970.4 | 1970.5 | 1970.5 | 1970.6   | 1970.7 | 1969.8 |
|                     | Sibling group size        | Mean      | 3.9    | 3.8    | 3.6    | 3.5    | 3.4    | 3.4    | 3.4    | 3.4    | 3.4    | 3.4    | 3.4    | 3.4    | 3.4    | 3.4    | 3.4      | 3.4    | 3.5    |
|                     | Income by birth year      | 1960-1964 | 14.7   | 12.9   | 11.2   | 11.0   | 10.8   | 11.4   | 11.4   | 11.0   | 12.4   | 11.8   | 12.3   | 12.7   | 13.8   | 11.7   | 12.8     | 10.9   | 11.6   |
|                     |                           | 1965-1969 | 38.5   | 32.1   | 32.6   | 32.0   | 30.0   | 31.0   | 31.8   | 33.8   | 30.9   | 30.6   | 33.0   | 33.5   | 34.6   | 36.7   | 30.4     | 35.7   | 32.3   |
|                     |                           | 1970-1974 | 22.7   | 26.3   | 23.1   | 23.4   | 23.9   | 24.9   | 26.5   | 23.8   | 27.0   | 28.5   | 27.3   | 28.5   | 27.6   | 26.4   | 26.4     | 27.6   | 25.2   |
|                     | 1975-1979                 | 24.0      | 20.5   | 20.6   | 21.4   | 21.2   | 21.8   | 23.2   | 20.6   | 24.6   | 22.6   | 24.3   | 24.4   | 22.4   | 18.4   | 23.0   | 24.6     | 22.1   |        |
|                     | 1980-1981                 | 16.8      | 14.4   | 12.6   | 12.8   | 12.3   | 13.0   | 12.8   | 13.2   | 13.0   | 14.0   | 11.5   | 13.5   | 14.1   | 14.4   | 15.7   | 14.1     | 13.1   |        |

TABLE S5. Descriptive Statistics: Length of the Subsequent Birth Interval in Relation to High School GPA at Age 16, Cognitive Ability at Ages 17-20, and Years of Education at Age 30.

|                         |                                 | Subsequent Birth Interval |        |        |        |        |        |        |        |        |        |        |        |        | Everyone |        |        |         |         |
|-------------------------|---------------------------------|---------------------------|--------|--------|--------|--------|--------|--------|--------|--------|--------|--------|--------|--------|----------|--------|--------|---------|---------|
|                         |                                 | 6-12                      | 13-18  | 19-24  | 25-30  | 31-36  | 37-42  | 43-48  | 49-54  | 55-60  | 61-66  | 67-72  | 73-78  | 79-84  |          | 85-90  | 91-96  | >96     |         |
| GPA                     | N                               | 1,185                     | 17,802 | 35,619 | 32,071 | 23,123 | 17,592 | 14,182 | 11,179 | 9,275  | 7,237  | 5,708  | 4,401  | 3,418  | 2,567    | 1,856  | 5,124  | 192,339 |         |
|                         | Mean                            | 189.5                     | 209.0  | 213.8  | 215.1  | 211.4  | 210.9  | 210.3  | 210.4  | 208.5  | 208.2  | 207.1  | 207.4  | 206.3  | 205.6    | 203.8  | 202.2  | 211.0   |         |
|                         | %                               | 51.0                      | 48.1   | 48.1   | 48.4   | 48.4   | 47.6   | 48.1   | 47.7   | 46.8   | 47.3   | 46.8   | 48.2   | 45.5   | 49.1     | 47.7   | 46.9   | 47.9    |         |
|                         | Mean                            | 1.6                       | 1.6    | 1.6    | 1.7    | 1.7    | 1.9    | 2.0    | 2.1    | 2.1    | 2.1    | 2.2    | 2.2    | 2.2    | 2.2      | 2.3    | 2.3    | 1.8     |         |
|                         | Mean                            | 25.3                      | 26.5   | 26.7   | 26.8   | 26.8   | 27.0   | 27.2   | 27.4   | 27.4   | 27.4   | 27.4   | 27.4   | 27.4   | 27.2     | 27.1   | 26.6   | 26.9    |         |
|                         | Maternal age                    | 1986.7                    | 1986.6 | 1986.5 | 1986.4 | 1985.9 | 1985.9 | 1986.0 | 1986.1 | 1986.1 | 1986.1 | 1986.0 | 1985.9 | 1986.1 | 1986.0   | 1986.1 | 1987.2 | 1986.2  |         |
|                         | Birth year                      | 3.8                       | 3.7    | 3.5    | 3.5    | 3.5    | 3.4    | 3.4    | 3.4    | 3.4    | 3.4    | 3.4    | 3.3    | 3.4    | 3.4      | 3.4    | 3.4    | 3.5     |         |
|                         | Sibling group size              | 1982-1984                 | 184.0  | 207.3  | 212.7  | 211.8  | 210.7  | 209.2  | 209.1  | 208.5  | 206.6  | 205.8  | 204.0  | 203.1  | 202.0    | 202.8  | 201.7  | 200.2   | 208.9   |
|                         | GPA by birth year               | 1985-1989                 | 190.7  | 210.1  | 215.4  | 217.0  | 212.6  | 211.5  | 210.4  | 211.2  | 207.9  | 209.0  | 208.7  | 210.5  | 210.2    | 206.1  | 202.2  | 201.5   | 212.3   |
|                         |                                 | 1990-1991                 | 192.9  | 207.9  | 208.3  | 213.3  | 207.4  | 213.4  | 213.0  | 212.2  | 214.4  | 210.8  | 209.4  | 208.8  | 205.7    | 210.8  | 210.7  | 205.1   | 210.1   |
| Cognitive ability       | N                               | 893                       | 6,217  | 9,738  | 10,247 | 9,664  | 7,599  | 6,251  | 4,936  | 4,126  | 3,357  | 2,544  | 2,133  | 1,770  | 1,430    | 1,172  | 4,733  | 76,810  |         |
|                         | Mean                            | 4.8                       | 5.3    | 5.4    | 5.4    | 5.4    | 5.3    | 5.3    | 5.3    | 5.2    | 5.2    | 5.2    | 5.1    | 5.0    | 5.2      | 5.0    | 5.0    | 5.3     |         |
|                         | Mean                            | 1.6                       | 1.6    | 1.6    | 1.5    | 1.6    | 1.7    | 1.8    | 2.0    | 2.0    | 2.1    | 2.1    | 2.2    | 2.2    | 2.2      | 2.3    | 2.3    | 1.8     |         |
|                         | Mean                            | 24.0                      | 25.1   | 24.9   | 24.9   | 24.8   | 25.0   | 25.3   | 25.5   | 25.6   | 25.8   | 25.6   | 25.8   | 25.7   | 25.7     | 25.8   | 25.5   | 25.2    |         |
|                         | Maternal age                    | 1969.2                    | 1969.4 | 1969.7 | 1969.9 | 1969.9 | 1969.9 | 1970.1 | 1970.1 | 1970.3 | 1970.6 | 1970.5 | 1970.5 | 1970.6 | 1970.6   | 1970.7 | 1970.9 | 1971.4  |         |
|                         | Birth year                      | 3.8                       | 3.7    | 3.6    | 3.5    | 3.4    | 3.4    | 3.4    | 3.4    | 3.4    | 3.4    | 3.4    | 3.4    | 3.4    | 3.4      | 3.4    | 3.4    | 3.5     |         |
|                         | Sibling group size              | 1965-1969                 | 4.9    | 5.3    | 5.5    | 5.4    | 5.4    | 5.4    | 5.4    | 5.3    | 5.2    | 5.3    | 5.1    | 5.1    | 5.1      | 5.2    | 5.0    | 5.3     |         |
|                         | Cognitive ability by birth year | 1970-1974                 | 4.8    | 5.4    | 5.4    | 5.4    | 5.4    | 5.3    | 5.3    | 5.2    | 5.2    | 5.1    | 5.1    | 5.1    | 4.9      | 5.2    | 4.9    | 5.3     |         |
|                         |                                 | 1975-1977                 | 4.9    | 5.3    | 5.4    | 5.4    | 5.2    | 5.3    | 5.2    | 5.3    | 5.2    | 5.1    | 5.0    | 5.0    | 5.1      | 5.1    | 5.0    | 5.2     |         |
|                         | Educational attainment          | N                         | 4,453  | 34,818 | 53,736 | 55,668 | 53,296 | 42,605 | 35,007 | 27,750 | 23,259 | 18,442 | 15,185 | 12,293 | 10,390   | 8,382  | 6,901  | 28,750  | 430,935 |
| Mean                    |                                 | 11.8                      | 12.4   | 12.6   | 12.7   | 12.7   | 12.7   | 12.7   | 12.6   | 12.6   | 12.6   | 12.5   | 12.5   | 12.5   | 12.5     | 12.5   | 12.4   | 12.6    |         |
| %                       |                                 | 48.3                      | 48.3   | 48.3   | 48.5   | 48.1   | 48.5   | 48.2   | 48.4   | 47.7   | 47.6   | 48.5   | 47.6   | 47.2   | 49.4     | 47.6   | 47.4   | 48.2    |         |
| Mean                    |                                 | 1.6                       | 1.7    | 1.6    | 1.6    | 1.6    | 1.7    | 1.8    | 1.9    | 2.0    | 2.1    | 2.1    | 2.2    | 2.2    | 2.2      | 2.2    | 2.2    | 1.8     |         |
| Maternal age            |                                 | 24.0                      | 25.0   | 25.1   | 25.0   | 25.0   | 25.3   | 25.5   | 25.7   | 25.9   | 26.0   | 26.0   | 26.1   | 26.0   | 26.0     | 25.9   | 25.5   | 25.4    |         |
| Birth year              |                                 | 1967.5                    | 1967.9 | 1968.7 | 1969.0 | 1969.1 | 1969.2 | 1969.3 | 1969.4 | 1969.5 | 1969.9 | 1969.8 | 1970.0 | 1970.1 | 1970.2   | 1970.3 | 1970.5 | 1969.2  |         |
| Sibling group size      |                                 | 3.8                       | 3.8    | 3.6    | 3.5    | 3.4    | 3.4    | 3.4    | 3.4    | 3.4    | 3.4    | 3.4    | 3.4    | 3.4    | 3.4      | 3.4    | 3.4    | 3.5     |         |
| Income by birth year    |                                 | 1960-1964                 | 11.3   | 11.7   | 11.9   | 12.0   | 12.0   | 12.0   | 12.0   | 11.9   | 11.8   | 11.7   | 11.7   | 11.9   | 11.8     | 11.7   | 11.7   | 11.6    | 11.9    |
| Education by birth year |                                 | 1965-1969                 | 11.6   | 12.1   | 12.3   | 12.3   | 12.3   | 12.2   | 12.2   | 12.1   | 12.1   | 12.0   | 12.0   | 12.0   | 11.9     | 12.0   | 11.9   | 11.8    | 12.1    |
|                         |                                 | 1970-1974                 | 12.3   | 13.0   | 13.1   | 13.1   | 13.1   | 13.0   | 13.0   | 12.9   | 12.8   | 12.9   | 12.8   | 12.8   | 12.7     | 12.8   | 12.7   | 12.6    | 13.0    |
|                         | 1975-1979                       | 12.7                      | 13.5   | 13.6   | 13.7   | 13.6   | 13.6   | 13.6   | 13.6   | 13.5   | 13.5   | 13.5   | 13.3   | 13.4   | 13.4     | 13.3   | 13.2   | 13.6    |         |
|                         | 1980-1981                       | 12.6                      | 13.3   | 13.5   | 13.6   | 13.5   | 13.6   | 13.6   | 13.7   | 13.6   | 13.6   | 13.6   | 13.7   | 13.3   | 13.4     | 13.5   | 13.3   | 13.5    |         |

TABLE S6. Results: Relationship Between Preceding Birth Interval and High School GPA for Swedish Men and Women Born 1982-1991.

|                           |                    | Within-family |             |                | Between-family |                |                |
|---------------------------|--------------------|---------------|-------------|----------------|----------------|----------------|----------------|
|                           |                    | Beta          | SE          | 95% CI         | Beta           | SE             | 95% CI         |
| Preceding Interval Length | 6-12               | -1.25         | 2.02        | -5.22, 2.71    | -15.42         | 1.97           | -19.29, -11.55 |
|                           | 13-18              | 2.00          | 0.64        | 0.74, 3.26     | -1.31          | 0.56           | -2.42, -0.21   |
|                           | 19-24              | 0.85          | 0.53        | -0.18, 1.88    | 0.80           | 0.45           | -0.08, 1.67    |
|                           | 25-30 (ref)        | 0.00          |             |                | 0.00           |                |                |
|                           | 31-36              | -0.82         | 0.57        | -1.94, 0.30    | -3.06          | 0.49           | -4.02, -2.10   |
|                           | 37-42              | -1.03         | 0.63        | -2.26, 0.19    | -5.27          | 0.54           | -6.33, -4.21   |
|                           | 43-48              | -0.88         | 0.69        | -2.23, 0.47    | -6.10          | 0.60           | -7.28, -4.93   |
|                           | 49-54              | -1.97         | 0.77        | -3.48, -0.45   | -7.83          | 0.68           | -9.17, -6.49   |
|                           | 55-60              | -0.08         | 0.86        | -1.77, 1.62    | -9.35          | 0.77           | -10.87, -7.83  |
|                           | 61-66              | -1.70         | 0.99        | -3.65, 0.24    | -11.63         | 0.89           | -13.37, -9.90  |
|                           | 67-72              | -2.39         | 1.13        | -4.61, -0.17   | -13.58         | 1.03           | -15.59, -11.56 |
|                           | 73-78              | -1.14         | 1.28        | -3.65, 1.38    | -13.57         | 1.14           | -15.80, -11.33 |
|                           | 79-84              | -0.53         | 1.47        | -3.41, 2.35    | -14.87         | 1.37           | -17.55, -12.19 |
|                           | 85-90              | 1.51          | 1.71        | -1.83, 4.86    | -13.81         | 1.56           | -16.86, -10.75 |
|                           | 91-96              | -0.77         | 1.97        | -4.64, 3.09    | -17.68         | 1.87           | -21.34, -14.03 |
| 97+                       | 0.91               | 1.33          | -1.70, 3.51 | -23.76         | 1.27           | -26.25, -21.26 |                |
| Sex                       | Male (ref)         | 0.00          |             |                | 0.00           |                |                |
|                           | Female             | 21.48         | 0.31        | 20.87, 22.08   | 22.68          | 0.28           | 22.13, 23.23   |
| Birth Order               | 2 (ref)            | 0.00          |             |                | 0.00           |                |                |
|                           | 3                  | -9.27         | 0.61        | -10.48, -8.07  | -13.38         | 0.31           | -13.99, -12.77 |
|                           | 4                  | -16.44        | 1.22        | -18.84, -14.04 | -25.04         | 0.65           | -26.31, -23.77 |
|                           | 5                  | -25.16        | 1.91        | -28.91, -21.41 | -37.87         | 1.32           | -40.47, -35.28 |
|                           | 6                  | -30.45        | 2.78        | -35.89, -25.01 | -45.38         | 2.46           | -50.21, -40.56 |
|                           | 7                  | -35.69        | 4.06        | -43.65, -27.73 | -48.32         | 4.35           | -56.85, -39.78 |
| Maternal Age              | 15-19              | 1.79          | 4.26        | -6.56, 10.14   | -51.82         | 4.15           | -59.95, -43.68 |
|                           | 20-24              | 0.18          | 0.70        | -1.18, 1.54    | -23.92         | 0.46           | -24.83, -23.01 |
|                           | 25-29 (ref)        | 0.00          |             |                | 0.00           |                |                |
|                           | 30-34              | 0.18          | 0.60        | -0.99, 1.35    | 19.49          | 0.35           | 18.81, 20.17   |
|                           | 35-39              | 0.90          | 1.11        | -1.29, 3.08    | 32.53          | 0.58           | 31.38, 33.67   |
|                           | 40-44              | -0.01         | 2.00        | -3.92, 3.91    | 37.37          | 1.52           | 34.38, 40.35   |
|                           | 45+                | 1.22          | 7.41        | -13.32, 15.75  | 49.85          | 7.35           | 35.44, 64.27   |
| Birth Year                | 1982               | -6.83         | 0.91        | -8.62, -5.05   | 0.59           | 0.67           | -0.72, 1.90    |
|                           | 1983               | -3.77         | 0.80        | -5.34, -2.20   | 0.25           | 0.69           | -1.10, 1.60    |
|                           | 1984               | -2.19         | 0.73        | -3.63, -0.76   | 0.29           | 0.69           | -1.07, 1.65    |
|                           | 1985 (ref)         | 0.00          |             |                | 0.00           |                |                |
|                           | 1986               | 3.10          | 0.69        | 1.74, 4.45     | 1.62           | 0.65           | 0.35, 2.89     |
|                           | 1987               | 6.20          | 0.75        | 4.73, 7.66     | 1.99           | 0.62           | 0.77, 3.21     |
|                           | 1988               | 8.20          | 0.87        | 6.49, 9.91     | 2.87           | 0.61           | 1.68, 4.06     |
|                           | 1989               | 9.20          | 1.03        | 7.18, 11.23    | 1.21           | 0.61           | 0.01, 2.40     |
|                           | 1990               | 11.15         | 1.23        | 8.75, 13.55    | 0.87           | 0.61           | -0.33, 2.07    |
|                           | 1991               | 13.41         | 1.42        | 10.63, 16.19   | 2.85           | 0.62           | 1.64, 4.06     |
|                           | Sibling Group Size | 3 (ref)       |             |                |                | 0.00           |                |
| 4                         |                    |               |             |                | -2.44          | 0.44           | -3.30, -1.57   |
| 5                         |                    |               |             |                | -4.95          | 0.86           | -6.63, -3.27   |
| 6                         |                    |               |             |                | -4.32          | 1.64           | -7.53, -1.11   |
| 7+                        |                    |               |             |                | -2.86          | 2.23           | -7.24, 1.52    |
| N                         |                    | 177,931       |             |                | 177,931        |                |                |

TABLE S7. Results: Relationship Between Subsequent Birth Interval and High School GPA for Swedish Men and Women Born 1982-1991.

|                            |             | Within-family |              |                | Between-family |              |                |
|----------------------------|-------------|---------------|--------------|----------------|----------------|--------------|----------------|
|                            |             | Beta          | SE           | 95% CI         | Beta           | SE           | 95% CI         |
| Subsequent Interval Length | 6-12        | -1.058        | 1.754        | -4.50, 2.38    | -20.532        | 1.932        | -24.32, -16.74 |
|                            | 13-18       | -1.627        | 0.574        | -2.75, -0.50   | -5.316         | 0.550        | -6.39, -4.24   |
|                            | 19-24       | -1.879        | 0.455        | -2.77, -0.99   | -1.999         | 0.440        | -2.86, -1.14   |
|                            | 25-30 (ref) | 0.000         |              |                | 0.000          |              |                |
|                            | 31-36       | -0.519        | 0.520        | -1.54, 0.50    | -2.297         | 0.490        | -3.26, -1.34   |
|                            | 37-42       | 0.395         | 0.581        | -0.74, 1.53    | -1.687         | 0.536        | -2.74, -0.64   |
|                            | 43-48       | -0.505        | 0.636        | -1.75, 0.74    | -1.474         | 0.579        | -2.61, -0.34   |
|                            | 49-54       | -0.059        | 0.702        | -1.44, 1.32    | -1.054         | 0.634        | -2.30, 0.19    |
|                            | 55-60       | -1.302        | 0.763        | -2.80, 0.19    | -2.031         | 0.689        | -3.38, -0.68   |
|                            | 61-66       | -0.923        | 0.846        | -2.58, 0.74    | -2.121         | 0.757        | -3.61, -0.64   |
|                            | 67-72       | 0.140         | 0.956        | -1.73, 2.01    | -2.712         | 0.840        | -4.36, -1.07   |
|                            | 73-78       | 0.638         | 1.080        | -1.48, 2.76    | -2.641         | 0.934        | -4.47, -0.81   |
|                            | 79-84       | -0.732        | 1.208        | -3.10, 1.64    | -2.678         | 1.040        | -4.72, -0.64   |
|                            | 85-90       | -1.569        | 1.382        | -4.28, 1.14    | -3.272         | 1.165        | -5.55, -0.99   |
|                            | 91-96       | -2.454        | 1.590        | -5.57, 0.66    | -4.116         | 1.432        | -6.92, -1.31   |
| 97+                        | -2.074      | 0.932         | -3.90, -0.25 | -4.005         | 0.884          | -5.74, -2.27 |                |
| Sex                        | Male (ref)  | 0.000         |              |                | 0.000          |              |                |
|                            | Female      | 22.726        | 0.288        | 22.16, 23.29   | 23.136         | 0.269        | 22.61, 23.66   |
| Birth Order                | 1           | 10.746        | 0.613        | 9.54, 11.95    | 15.676         | 0.308        | 15.07, 16.28   |
|                            | 2 (ref)     | 0.000         |              |                | 0.000          |              |                |
|                            | 3           | -8.797        | 0.713        | -10.20, -7.40  | -13.311        | 0.487        | -14.27, -12.36 |
|                            | 4           | -15.197       | 1.421        | -17.98, -12.41 | -22.052        | 1.083        | -24.17, -19.93 |
|                            | 5           | -24.491       | 2.300        | -29.00, -19.98 | -30.999        | 2.133        | -35.18, -26.82 |
|                            | 6           | -24.507       | 3.540        | -31.45, -17.57 | -31.766        | 3.724        | -39.07, -24.47 |
| Maternal Age               | 15-19       | 0.517         | 1.283        | -2.00, 3.03    | -50.778        | 1.183        | -53.10, -48.46 |
|                            | 20-24       | -0.433        | 0.510        | -1.43, 0.57    | -23.134        | 0.346        | -23.81, -22.46 |
|                            | 25-29 (ref) | 0.000         |              |                | 0.000          |              |                |
|                            | 30-34       | 0.190         | 0.561        | -0.91, 1.29    | 15.123         | 0.370        | 14.40, 15.85   |
|                            | 35-39       | 2.492         | 1.281        | -0.02, 5.00    | 20.413         | 0.845        | 18.76, 22.07   |
|                            | 40-44       | -4.997        | 4.150        | -13.13, 3.14   | 15.983         | 3.956        | 8.23, 23.74    |
|                            | 45+         | 70.537        | 57.843       | -42.83, 183.91 | 47.184         | 35.327       | -22.06, 116.42 |
| Birth Year                 | 1982        | -8.808        | 0.875        | -10.52, -7.09  | -1.591         | 0.521        | -2.61, -0.57   |
|                            | 1983        | -4.549        | 0.727        | -5.97, -3.12   | -0.377         | 0.529        | -1.41, 0.66    |
|                            | 1984        | -1.800        | 0.634        | -3.04, -0.56   | 0.047          | 0.554        | -1.04, 1.13    |
|                            | 1985 (ref)  | 0.000         |              |                | 0.000          |              |                |
|                            | 1986        | 3.225         | 0.597        | 2.06, 4.39     | 1.506          | 0.547        | 0.43, 2.58     |
|                            | 1987        | 6.765         | 0.667        | 5.46, 8.07     | 2.518          | 0.529        | 1.48, 3.55     |
|                            | 1988        | 8.152         | 0.829        | 6.53, 9.78     | 3.074          | 0.536        | 2.02, 4.12     |
|                            | 1989        | 10.454        | 1.025        | 8.45, 12.46    | 2.690          | 0.566        | 1.58, 3.80     |
|                            | 1990        | 11.811        | 1.246        | 9.37, 14.25    | 2.136          | 0.645        | 0.87, 3.40     |
|                            | 1991        | 14.201        | 1.476        | 11.31, 17.09   | 3.875          | 0.686        | 2.53, 5.22     |
| Sibling Group Size         | 3 (ref)     |               |              |                | 0.000          |              |                |
|                            | 4           |               |              |                | -2.735         | 0.457        | -3.63, -1.84   |
|                            | 5           |               |              |                | -6.202         | 0.894        | -7.95, -4.45   |
|                            | 6           |               |              |                | -6.026         | 1.754        | -9.46, -2.59   |
|                            | 7           |               |              |                | -6.091         | 2.372        | -10.74, -1.44  |
| N                          |             | 192,339       |              |                | 192,339        |              |                |

TABLE S8. Results: Relationship Between Preceding Birth Interval and IQ for Swedish Men Born 1965-1977. Estimates for Age at Conscription Test and Year of Conscription Test Not Shown.

|                           |              | Within-family |             |              | Between-family |              |              |
|---------------------------|--------------|---------------|-------------|--------------|----------------|--------------|--------------|
|                           |              | Beta          | SE          | 95% CI       | Beta           | SE           | 95% CI       |
| Preceding Interval Length | 6-12         | -0.04         | 0.08        | -0.19, 0.12  | -0.19          | 0.06         | -0.32, -0.07 |
|                           | 13-18        | -0.03         | 0.04        | -0.10, 0.05  | 0.01           | 0.03         | -0.05, 0.07  |
|                           | 19-24        | -0.02         | 0.03        | -0.08, 0.05  | 0.08           | 0.03         | 0.03, 0.13   |
|                           | 25-30 (ref)  | 0.00          |             |              | 0.00           |              |              |
|                           | 31-36        | -0.04         | 0.03        | -0.10, 0.03  | -0.12          | 0.03         | -0.17, -0.07 |
|                           | 37-42        | -0.09         | 0.04        | -0.16, -0.01 | -0.20          | 0.03         | -0.26, -0.15 |
|                           | 43-48        | -0.09         | 0.04        | -0.17, -0.01 | -0.25          | 0.03         | -0.31, -0.19 |
|                           | 49-54        | -0.12         | 0.04        | -0.20, -0.03 | -0.35          | 0.03         | -0.41, -0.28 |
|                           | 55-60        | -0.11         | 0.05        | -0.21, -0.02 | -0.36          | 0.04         | -0.43, -0.29 |
|                           | 61-66        | -0.07         | 0.05        | -0.18, 0.03  | -0.41          | 0.04         | -0.49, -0.33 |
|                           | 67-72        | -0.11         | 0.06        | -0.23, 0.01  | -0.46          | 0.05         | -0.56, -0.37 |
|                           | 73-78        | -0.12         | 0.07        | -0.25, 0.01  | -0.57          | 0.05         | -0.67, -0.47 |
|                           | 79-84        | -0.09         | 0.08        | -0.24, 0.06  | -0.53          | 0.06         | -0.65, -0.42 |
|                           | 85-90        | -0.05         | 0.09        | -0.22, 0.11  | -0.45          | 0.07         | -0.57, -0.32 |
|                           | 91-96        | 0.00          | 0.10        | -0.19, 0.20  | -0.55          | 0.08         | -0.71, -0.40 |
| 97+                       | 0.00         | 0.07          | -0.15, 0.14 | -0.62        | 0.05           | -0.72, -0.51 |              |
| Birth Order               | 2 (ref)      | 0.00          |             |              | 0.00           |              |              |
|                           | 3            | -0.37         | 0.03        | -0.44, -0.30 | -0.56          | 0.02         | -0.59, -0.53 |
|                           | 4            | -0.57         | 0.07        | -0.70, -0.44 | -1.01          | 0.03         | -1.07, -0.94 |
|                           | 5            | -0.73         | 0.10        | -0.93, -0.53 | -1.40          | 0.06         | -1.52, -1.28 |
|                           | 6            | -0.94         | 0.14        | -1.22, -0.66 | -1.80          | 0.10         | -1.99, -1.61 |
|                           | 7            | -1.03         | 0.19        | -1.40, -0.67 | -2.21          | 0.13         | -2.46, -1.96 |
|                           | Maternal Age | 15-19         | -0.16       | 0.11         | -0.37, 0.06    | -1.48        | 0.07         |
| 20-24                     | -0.05        | 0.04          | -0.12, 0.02 | -0.80        | 0.02           | -0.84, -0.77 |              |
| 25-29 (ref)               | 0.00         |               |             | 0.00         |                |              |              |
|                           | 30-34        | 0.01          | 0.04        | -0.06, 0.08  | 0.54           | 0.02         | 0.50, 0.58   |
|                           | 35-39        | -0.08         | 0.07        | -0.21, 0.06  | 0.78           | 0.03         | 0.72, 0.85   |
|                           | 40-44        | -0.30         | 0.12        | -0.54, -0.07 | 0.75           | 0.08         | 0.60, 0.91   |
|                           | 45+          | -0.95         | 0.32        | -1.58, -0.32 | 0.69           | 0.32         | 0.06, 1.33   |
| Birth Year                | 1965         | 0.92          | 0.24        | 0.44, 1.40   | 2.42           | 0.23         | 1.97, 2.88   |
|                           | 1966         | 0.84          | 0.20        | 0.45, 1.23   | 2.08           | 0.18         | 1.72, 2.44   |
|                           | 1967         | 0.62          | 0.16        | 0.29, 0.94   | 1.43           | 0.15         | 1.13, 1.73   |
|                           | 1968         | 0.39          | 0.13        | 0.14, 0.63   | 0.92           | 0.12         | 0.70, 1.15   |
|                           | 1969         | 0.24          | 0.09        | 0.06, 0.41   | 0.62           | 0.08         | 0.46, 0.78   |
|                           | 1970 (ref)   | 0.00          |             |              | 0.00           |              |              |
|                           | 1971         | -0.35         | 0.08        | -0.51, -0.19 | -0.47          | 0.07         | -0.60, -0.33 |
|                           | 1972         | -0.47         | 0.11        | -0.69, -0.24 | -0.81          | 0.10         | -1.00, -0.62 |
|                           | 1973         | -0.73         | 0.14        | -1.01, -0.46 | -1.33          | 0.12         | -1.56, -1.10 |
|                           | 1974         | -0.92         | 0.17        | -1.25, -0.59 | -1.75          | 0.14         | -2.02, -1.49 |
|                           | 1975         | -1.22         | 0.20        | -1.60, -0.84 | -1.97          | 0.15         | -2.27, -1.67 |
|                           | 1976         | -1.31         | 0.22        | -1.75, -0.87 | -2.07          | 0.17         | -2.40, -1.74 |
|                           | 1977         | -1.55         | 0.26        | -2.06, -1.05 | -2.20          | 0.19         | -2.57, -1.83 |
| Sibling Group Size        | 3 (ref)      |               |             |              | 0.00           |              |              |
|                           | 4            |               |             |              | 0.03           | 0.02         | -0.01, 0.07  |
|                           | 5            |               |             |              | -0.09          | 0.04         | -0.17, -0.01 |
|                           | 6            |               |             |              | -0.05          | 0.07         | -0.18, 0.09  |
|                           | 7+           |               |             |              | -0.03          | 0.09         | -0.20, 0.14  |
| N                         |              | 70,904        |             |              | 70,904         |              |              |



TABLE S9. Results: Relationship Between Subsequent Birth Interval and IQ for Swedish Men Born 1965-1977. Estimates for Age at Conscription Test and Year of Conscription Test Not Shown.

|                            |             | Within-family |              |              | Between-family |              |              |
|----------------------------|-------------|---------------|--------------|--------------|----------------|--------------|--------------|
|                            |             | Beta          | SE           | 95% CI       | Beta           | SE           | 95% CI       |
| Subsequent Interval Length | 6-12        | 0.00          | 0.08         | -0.15, 0.16  | -0.43          | 0.06         | -0.56, -0.31 |
|                            | 13-18       | -0.01         | 0.04         | -0.08, 0.07  | -0.12          | 0.03         | -0.18, -0.06 |
|                            | 19-24       | -0.01         | 0.03         | -0.07, 0.05  | 0.01           | 0.03         | -0.04, 0.06  |
|                            | 25-30 (ref) | 0.00          |              |              | 0.00           |              |              |
|                            | 31-36       | 0.02          | 0.03         | -0.04, 0.08  | -0.02          | 0.03         | -0.07, 0.03  |
|                            | 37-42       | 0.03          | 0.03         | -0.04, 0.09  | -0.03          | 0.03         | -0.08, 0.03  |
|                            | 43-48       | 0.03          | 0.04         | -0.04, 0.10  | -0.01          | 0.03         | -0.07, 0.05  |
|                            | 49-54       | 0.08          | 0.04         | 0.00, 0.16   | 0.00           | 0.03         | -0.06, 0.07  |
|                            | 55-60       | 0.01          | 0.04         | -0.08, 0.09  | -0.03          | 0.04         | -0.10, 0.04  |
|                            | 61-66       | 0.01          | 0.05         | -0.08, 0.10  | -0.02          | 0.04         | -0.09, 0.06  |
|                            | 67-72       | -0.01         | 0.05         | -0.11, 0.09  | 0.00           | 0.04         | -0.08, 0.08  |
|                            | 73-78       | -0.06         | 0.06         | -0.17, 0.05  | -0.13          | 0.05         | -0.22, -0.04 |
|                            | 79-84       | -0.09         | 0.06         | -0.21, 0.03  | -0.12          | 0.05         | -0.21, -0.02 |
|                            | 85-90       | 0.12          | 0.07         | 0.00, 0.25   | 0.01           | 0.05         | -0.09, 0.12  |
|                            | 91-96       | -0.08         | 0.07         | -0.22, 0.05  | -0.16          | 0.06         | -0.27, -0.04 |
| 97+                        | -0.03       | 0.04          | -0.11, 0.05  | -0.07        | 0.03           | -0.14, -0.01 |              |
| Birth Order                | 1           | 0.30          | 0.04         | 0.23, 0.37   | 0.62           | 0.02         | 0.59, 0.65   |
|                            | 2 (ref)     | 0.00          |              |              | 0.00           |              |              |
|                            | 3           | -0.22         | 0.04         | -0.30, -0.14 | -0.56          | 0.03         | -0.61, -0.51 |
|                            | 4           | -0.24         | 0.08         | -0.40, -0.07 | -0.95          | 0.06         | -1.05, -0.84 |
|                            | 5           | -0.44         | 0.13         | -0.70, -0.18 | -1.37          | 0.10         | -1.56, -1.18 |
|                            | 6           | -0.50         | 0.19         | -0.88, -0.12 | -1.61          | 0.14         | -1.88, -1.33 |
| Maternal Age               | 15-19       | -0.02         | 0.06         | -0.13, 0.09  | -1.48          | 0.03         | -1.55, -1.42 |
|                            | 20-24       | 0.05          | 0.03         | -0.01, 0.11  | -0.75          | 0.02         | -0.78, -0.71 |
|                            | 25-29 (ref) | 0.00          |              |              | 0.00           |              |              |
|                            | 30-34       | -0.04         | 0.04         | -0.12, 0.03  | 0.36           | 0.02         | 0.31, 0.40   |
|                            | 35-39       | -0.19         | 0.10         | -0.39, 0.01  | 0.47           | 0.06         | 0.37, 0.58   |
|                            | 40-44       | -0.16         | 0.34         | -0.82, 0.51  | 0.45           | 0.19         | 0.09, 0.82   |
| 45+                        | 0.00        | 0.00          | 0.00, 0.00   | 0.19         | 0.54           | -0.86, 1.25  |              |
| Birth Year                 | 1965        | 1.41          | 0.22         | 0.97, 1.85   | 2.73           | 0.18         | 2.37, 3.08   |
|                            | 1966        | 1.09          | 0.18         | 0.74, 1.45   | 2.18           | 0.15         | 1.89, 2.47   |
|                            | 1967        | 0.79          | 0.14         | 0.51, 1.07   | 1.50           | 0.13         | 1.26, 1.75   |
|                            | 1968        | 0.45          | 0.11         | 0.23, 0.66   | 0.96           | 0.10         | 0.77, 1.16   |
|                            | 1969        | 0.30          | 0.08         | 0.15, 0.45   | 0.57           | 0.07         | 0.43, 0.72   |
|                            | 1970 (ref)  | 0.00          |              |              | 0.00           |              |              |
|                            | 1971        | -0.32         | 0.07         | -0.47, -0.18 | -0.48          | 0.06         | -0.60, -0.36 |
|                            | 1972        | -0.49         | 0.10         | -0.69, -0.29 | -0.82          | 0.09         | -0.99, -0.64 |
|                            | 1973        | -0.91         | 0.13         | -1.15, -0.66 | -1.42          | 0.11         | -1.64, -1.20 |
|                            | 1974        | -1.14         | 0.15         | -1.44, -0.85 | -1.85          | 0.13         | -2.11, -1.59 |
|                            | 1975        | -1.31         | 0.17         | -1.65, -0.97 | -2.09          | 0.15         | -2.39, -1.80 |
|                            | 1976        | -1.28         | 0.20         | -1.67, -0.89 | -2.19          | 0.17         | -2.53, -1.85 |
| 1977                       | -1.43       | 0.23          | -1.88, -0.99 | -2.30        | 0.20           | -2.68, -1.91 |              |
| Sibling Group Size         | 3 (ref)     |               |              |              | 0.00           |              |              |
|                            | 4           |               |              |              | 0.02           | 0.02         | -0.02, 0.07  |
|                            | 5           |               |              |              | -0.11          | 0.04         | -0.19, -0.02 |
|                            | 6           |               |              |              | -0.03          | 0.07         | -0.17, 0.12  |
|                            | 7+          |               |              |              | -0.03          | 0.09         | -0.22, 0.15  |
| N                          |             | 76,810        |              |              | 76,810         |              |              |

TABLE S10. Results: Relationship Between Preceding Birth Interval and Educational Attainment at Age 30 for Swedish Men and Women Born 1960-1981.

|                           |              | Within-family |              |              | Between-family |              |              |
|---------------------------|--------------|---------------|--------------|--------------|----------------|--------------|--------------|
|                           |              | Beta          | SE           | 95% CI       | Beta           | SE           | 95% CI       |
| Preceding Interval Length | 6-12         | 0.03          | 0.03         | -0.04, 0.09  | -0.26          | 0.03         | -0.31, -0.20 |
|                           | 13-18        | 0.01          | 0.02         | -0.02, 0.04  | -0.01          | 0.01         | -0.03, 0.02  |
|                           | 19-24        | 0.03          | 0.01         | 0.00, 0.06   | 0.04           | 0.01         | 0.02, 0.07   |
|                           | 25-30 (ref)  | 0.00          |              |              | 0.00           |              |              |
|                           | 31-36        | -0.03         | 0.01         | -0.05, 0.00  | -0.09          | 0.01         | -0.11, -0.06 |
|                           | 37-42        | -0.01         | 0.02         | -0.04, 0.02  | -0.15          | 0.01         | -0.18, -0.13 |
|                           | 43-48        | -0.05         | 0.02         | -0.08, -0.02 | -0.26          | 0.01         | -0.28, -0.23 |
|                           | 49-54        | -0.05         | 0.02         | -0.08, -0.01 | -0.35          | 0.02         | -0.38, -0.32 |
|                           | 55-60        | -0.03         | 0.02         | -0.06, 0.01  | -0.41          | 0.02         | -0.45, -0.38 |
|                           | 61-66        | -0.02         | 0.02         | -0.06, 0.02  | -0.46          | 0.02         | -0.49, -0.42 |
|                           | 67-72        | -0.02         | 0.02         | -0.07, 0.02  | -0.54          | 0.02         | -0.58, -0.51 |
|                           | 73-78        | -0.02         | 0.03         | -0.07, 0.04  | -0.58          | 0.02         | -0.63, -0.54 |
|                           | 79-84        | -0.01         | 0.03         | -0.07, 0.05  | -0.64          | 0.02         | -0.69, -0.60 |
|                           | 85-90        | 0.05          | 0.03         | -0.01, 0.12  | -0.66          | 0.03         | -0.71, -0.60 |
| 91-96                     | 0.08         | 0.04          | 0.01, 0.15   | -0.68        | 0.03           | -0.74, -0.62 |              |
| 97+                       | 0.09         | 0.03          | 0.04, 0.15   | -0.84        | 0.02           | -0.88, -0.80 |              |
| Sex                       | Male (ref)   | 0.00          |              |              | 0.00           |              |              |
|                           | Female       | 0.39          | 0.01         | 0.37, 0.40   | 0.43           | 0.01         | 0.41, 0.44   |
| Birth Order               | 2 (ref)      | 0.00          |              | 0.00, 0.00   | 0.00           |              |              |
|                           | 3            | -0.19         | 0.01         | -0.22, -0.16 | -0.55          | 0.01         | -0.56, -0.54 |
|                           | 4            | -0.30         | 0.03         | -0.35, -0.25 | -1.00          | 0.01         | -1.03, -0.98 |
|                           | 5            | -0.38         | 0.04         | -0.46, -0.31 | -1.34          | 0.02         | -1.39, -1.30 |
|                           | 6            | -0.37         | 0.05         | -0.48, -0.27 | -1.56          | 0.03         | -1.63, -1.49 |
|                           | 7            | -0.49         | 0.07         | -0.63, -0.35 | -1.95          | 0.05         | -2.05, -1.86 |
|                           | Maternal Age | 15-19         | -0.11        | 0.05         | -0.20, -0.03   | -1.62        | 0.03         |
| 20-24                     | -0.04        | 0.02          | -0.07, -0.01 | -0.94        | 0.01           | -0.96, -0.92 |              |
| 25-29 (ref)               | 0.00         |               |              | 0.00         |                |              |              |
| Birth Year                | 30-34        | 0.01          | 0.01         | -0.02, 0.03  | 0.64           | 0.01         | 0.62, 0.66   |
|                           | 35-39        | 0.00          | 0.03         | -0.05, 0.05  | 0.95           | 0.01         | 0.92, 0.98   |
|                           | 40-44        | -0.04         | 0.05         | -0.13, 0.05  | 1.05           | 0.03         | 1.00, 1.11   |
|                           | 45+          | -0.15         | 0.11         | -0.37, 0.07  | 1.16           | 0.10         | 0.97, 1.35   |
|                           | 1960         | -0.73         | 0.05         | -0.83, -0.64 | -0.70          | 0.02         | -0.74, -0.66 |
|                           | 1961         | -0.67         | 0.04         | -0.76, -0.58 | -0.65          | 0.02         | -0.69, -0.61 |
|                           | 1962         | -0.64         | 0.04         | -0.72, -0.57 | -0.62          | 0.02         | -0.66, -0.58 |
|                           | 1963         | -0.59         | 0.04         | -0.66, -0.52 | -0.59          | 0.02         | -0.63, -0.55 |
|                           | 1964         | -0.54         | 0.03         | -0.60, -0.47 | -0.56          | 0.02         | -0.60, -0.52 |
|                           | 1965         | -0.47         | 0.03         | -0.53, -0.41 | -0.48          | 0.02         | -0.51, -0.44 |
| 1966                      | -0.39        | 0.03          | -0.44, -0.34 | -0.41        | 0.02           | -0.45, -0.38 |              |
| 1967                      | -0.36        | 0.02          | -0.41, -0.31 | -0.37        | 0.02           | -0.41, -0.33 |              |
| 1968                      | -0.30        | 0.02          | -0.35, -0.26 | -0.31        | 0.02           | -0.34, -0.27 |              |
| 1969                      | -0.26        | 0.02          | -0.30, -0.21 | -0.27        | 0.02           | -0.31, -0.23 |              |
| 1970 (ref)                | 0.00         |               |              | 0.00         |                |              |              |
| 1971                      | 0.13         | 0.02          | 0.08, 0.17   | 0.14         | 0.02           | 0.10, 0.18   |              |
| 1972                      | 0.31         | 0.02          | 0.26, 0.35   | 0.31         | 0.02           | 0.27, 0.35   |              |
| 1973                      | 0.47         | 0.03          | 0.42, 0.52   | 0.49         | 0.02           | 0.45, 0.54   |              |
| 1974                      | 0.63         | 0.03          | 0.58, 0.69   | 0.64         | 0.02           | 0.60, 0.68   |              |
| 1975                      | 0.88         | 0.03          | 0.82, 0.94   | 0.84         | 0.02           | 0.80, 0.88   |              |
| 1976                      | 0.99         | 0.03          | 0.92, 1.05   | 0.98         | 0.02           | 0.94, 1.02   |              |
| 1977                      | 1.00         | 0.04          | 0.92, 1.07   | 1.01         | 0.02           | 0.97, 1.06   |              |
| 1978                      | 0.97         | 0.04          | 0.89, 1.05   | 0.92         | 0.02           | 0.88, 0.96   |              |
| 1979                      | 0.99         | 0.05          | 0.90, 1.07   | 0.93         | 0.02           | 0.89, 0.98   |              |
| 1980                      | 1.18         | 0.05          | 1.08, 1.27   | 1.09         | 0.02           | 1.05, 1.13   |              |
| 1981                      | 1.14         | 0.05          | 1.04, 1.25   | 1.03         | 0.02           | 0.99, 1.07   |              |
| Sibling Group Size        | 3 (ref)      |               |              |              | 0.00           |              |              |
|                           | 4            |               |              |              | -0.08          | 0.01         | -0.10, -0.06 |
|                           | 5            |               |              |              | -0.27          | 0.02         | -0.31, -0.24 |
|                           | 6            |               |              |              | -0.35          | 0.03         | -0.41, -0.29 |
|                           | 7+           |               |              |              | -0.40          | 0.04         | -0.47, -0.32 |
| N                         |              | 427,163       |              |              | 427,163        |              |              |

TABLE S11. Results: Relationship Between Subsequent Birth Interval and Educational Attainment at Age 30 for Swedish Men and Women Born 1960-1981.

|                            |             | Within-family |              |              | Between-family |              |              |
|----------------------------|-------------|---------------|--------------|--------------|----------------|--------------|--------------|
|                            |             | Beta          | SE           | 95% CI       | Beta           | SE           | 95% CI       |
| Subsequent Interval Length | 6-12        | -0.05         | 0.04         | -0.12, 0.02  | -0.51          | 0.03         | -0.57, -0.45 |
|                            | 13-18       | -0.02         | 0.02         | -0.05, 0.01  | -0.15          | 0.01         | -0.18, -0.13 |
|                            | 19-24       | -0.03         | 0.01         | -0.06, 0.00  | -0.05          | 0.01         | -0.07, -0.02 |
|                            | 25-30 (ref) | 0.00          |              |              | 0.00           |              |              |
|                            | 31-36       | -0.01         | 0.01         | -0.04, 0.02  | -0.01          | 0.01         | -0.03, 0.02  |
|                            | 37-42       | 0.00          | 0.02         | -0.03, 0.03  | -0.02          | 0.01         | -0.04, 0.01  |
|                            | 43-48       | 0.02          | 0.02         | -0.01, 0.05  | 0.00           | 0.01         | -0.03, 0.03  |
|                            | 49-54       | 0.02          | 0.02         | -0.02, 0.05  | -0.04          | 0.02         | -0.07, -0.01 |
|                            | 55-60       | -0.02         | 0.02         | -0.06, 0.02  | -0.08          | 0.02         | -0.11, -0.04 |
|                            | 61-66       | -0.04         | 0.02         | -0.08, 0.00  | -0.08          | 0.02         | -0.12, -0.05 |
|                            | 67-72       | -0.04         | 0.02         | -0.09, 0.00  | -0.10          | 0.02         | -0.14, -0.06 |
|                            | 73-78       | -0.01         | 0.03         | -0.06, 0.04  | -0.11          | 0.02         | -0.15, -0.07 |
|                            | 79-84       | -0.07         | 0.03         | -0.13, -0.02 | -0.15          | 0.02         | -0.20, -0.11 |
|                            | 85-90       | -0.04         | 0.03         | -0.10, 0.01  | -0.13          | 0.02         | -0.18, -0.08 |
| 91-96                      | -0.10       | 0.03          | -0.16, -0.04 | -0.16        | 0.03           | -0.21, -0.11 |              |
| 97+                        | -0.07       | 0.02          | -0.11, -0.03 | -0.18        | 0.02           | -0.21, -0.15 |              |
| Sex                        | Male (ref)  | 0.00          |              |              | 0.00           |              |              |
|                            | Female      | 0.43          | 0.01         | 0.42, 0.45   | 0.40           | 0.01         | 0.39, 0.41   |
| Birth Order                | 1           | 0.25          | 0.01         | 0.22, 0.28   | 0.63           | 0.01         | 0.62, 0.65   |
|                            | 2 (ref)     | 0.00          |              |              | 0.00           |              |              |
|                            | 3           | -0.15         | 0.02         | -0.18, -0.11 | -0.54          | 0.01         | -0.56, -0.52 |
|                            | 4           | -0.25         | 0.03         | -0.32, -0.19 | -0.89          | 0.02         | -0.94, -0.85 |
|                            | 5           | -0.30         | 0.05         | -0.40, -0.20 | -1.10          | 0.04         | -1.17, -1.03 |
|                            | 6           | -0.23         | 0.08         | -0.38, -0.08 | -1.25          | 0.05         | -1.35, -1.14 |
| Maternal Age               | 15-19       | -0.03         | 0.03         | -0.08, 0.02  | -1.74          | 0.01         | -1.77, -1.71 |
|                            | 20-24       | 0.00          | 0.01         | -0.03, 0.03  | -0.94          | 0.01         | -0.95, -0.92 |
|                            | 25-29 (ref) | 0.00          |              |              | 0.00           |              |              |
|                            | 30-34       | -0.02         | 0.02         | -0.05, 0.02  | 0.40           | 0.01         | 0.38, 0.42   |
|                            | 35-39       | -0.07         | 0.04         | -0.15, 0.01  | 0.40           | 0.02         | 0.35, 0.45   |
|                            | 40-44       | -0.12         | 0.12         | -0.36, 0.12  | 0.36           | 0.08         | 0.21, 0.51   |
| Birth Year                 | 45+         | -1.06         | 1.15         | -3.32, 1.20  | 0.01           | 0.65         | -1.27, 1.29  |
|                            | 1960        | -0.84         | 0.05         | -0.95, -0.73 | -0.73          | 0.02         | -0.77, -0.69 |
|                            | 1961        | -0.78         | 0.05         | -0.88, -0.69 | -0.68          | 0.02         | -0.72, -0.64 |
|                            | 1962        | -0.76         | 0.04         | -0.85, -0.67 | -0.65          | 0.02         | -0.69, -0.61 |
|                            | 1963        | -0.71         | 0.04         | -0.79, -0.63 | -0.61          | 0.02         | -0.65, -0.57 |
|                            | 1964        | -0.65         | 0.04         | -0.72, -0.58 | -0.59          | 0.02         | -0.63, -0.55 |
|                            | 1965        | -0.55         | 0.03         | -0.62, -0.49 | -0.51          | 0.02         | -0.55, -0.47 |
|                            | 1966        | -0.49         | 0.03         | -0.55, -0.44 | -0.45          | 0.02         | -0.49, -0.41 |
|                            | 1967        | -0.44         | 0.03         | -0.49, -0.39 | -0.38          | 0.02         | -0.42, -0.34 |
|                            | 1968        | -0.39         | 0.02         | -0.43, -0.34 | -0.34          | 0.02         | -0.38, -0.30 |
|                            | 1969        | -0.28         | 0.02         | -0.33, -0.24 | -0.26          | 0.02         | -0.30, -0.22 |
|                            | 1970 (ref)  | 0.00          |              |              | 0.00           |              |              |
|                            | 1971        | 0.10          | 0.02         | 0.05, 0.15   | 0.17           | 0.02         | 0.12, 0.21   |
|                            | 1972        | 0.30          | 0.02         | 0.26, 0.35   | 0.33           | 0.02         | 0.29, 0.38   |
|                            | 1973        | 0.43          | 0.03         | 0.38, 0.48   | 0.48           | 0.02         | 0.44, 0.52   |
|                            | 1974        | 0.61          | 0.03         | 0.55, 0.66   | 0.65           | 0.02         | 0.61, 0.70   |
|                            | 1975        | 0.83          | 0.03         | 0.77, 0.90   | 0.82           | 0.02         | 0.78, 0.87   |
| 1976                       | 0.92        | 0.04          | 0.85, 0.99   | 0.89         | 0.02           | 0.85, 0.93   |              |
| 1977                       | 0.97        | 0.04          | 0.90, 1.05   | 0.89         | 0.02           | 0.85, 0.94   |              |
| 1978                       | 0.90        | 0.04          | 0.81, 0.98   | 0.80         | 0.02           | 0.75, 0.85   |              |
| 1979                       | 0.98        | 0.05          | 0.89, 1.08   | 0.81         | 0.02           | 0.77, 0.86   |              |
| 1980                       | 1.13        | 0.05          | 1.03, 1.23   | 0.94         | 0.03           | 0.89, 0.99   |              |
| 1981                       | 1.14        | 0.06          | 1.03, 1.25   | 0.89         | 0.03           | 0.84, 0.94   |              |
| Sibling Group Size         | 3 (ref)     |               |              |              | 0.00           |              |              |
|                            | 4           |               |              |              | -0.10          | 0.01         | -0.12, -0.08 |
|                            | 5           |               |              |              | -0.30          | 0.02         | -0.34, -0.26 |
|                            | 6           |               |              |              | -0.40          | 0.03         | -0.46, -0.33 |
|                            | 7+          |               |              |              | -0.45          | 0.04         | -0.54, -0.36 |
| N                          |             | 430,935       |              |              | 430,935        |              |              |

TABLE S12. Results: Relationship Between Preceding Birth Interval and Logged Income Averaged Over Ages 29-31 for Swedish Men and Women Born 1960-1981.

|                           |              | Within-family |             |              | Between-family |              |              |
|---------------------------|--------------|---------------|-------------|--------------|----------------|--------------|--------------|
|                           |              | Beta          | SE          | 95% CI       | Beta           | SE           | 95% CI       |
| Preceding Interval Length | 6-12         | 0.05          | 0.02        | 0.01, 0.09   | -0.02          | 0.02         | -0.05, 0.01  |
|                           | 13-18        | 0.01          | 0.01        | 0.00, 0.03   | -0.01          | 0.01         | -0.03, 0.00  |
|                           | 19-24        | 0.01          | 0.01        | -0.01, 0.03  | 0.00           | 0.01         | -0.01, 0.01  |
|                           | 25-30 (ref)  | 0.00          |             |              | 0.00           |              |              |
|                           | 31-36        | 0.00          | 0.01        | -0.01, 0.02  | 0.00           | 0.01         | -0.01, 0.01  |
|                           | 37-42        | 0.01          | 0.01        | -0.01, 0.02  | 0.00           | 0.01         | -0.01, 0.01  |
|                           | 43-48        | -0.01         | 0.01        | -0.03, 0.01  | -0.01          | 0.01         | -0.02, 0.00  |
|                           | 49-54        | 0.00          | 0.01        | -0.02, 0.02  | -0.03          | 0.01         | -0.04, -0.01 |
|                           | 55-60        | 0.00          | 0.01        | -0.03, 0.02  | -0.03          | 0.01         | -0.04, -0.01 |
|                           | 61-66        | -0.01         | 0.01        | -0.03, 0.02  | -0.03          | 0.01         | -0.04, -0.01 |
|                           | 67-72        | 0.00          | 0.01        | -0.03, 0.03  | -0.04          | 0.01         | -0.05, -0.02 |
|                           | 73-78        | -0.01         | 0.01        | -0.04, 0.02  | -0.03          | 0.01         | -0.05, -0.02 |
|                           | 79-84        | -0.02         | 0.02        | -0.06, 0.01  | -0.05          | 0.01         | -0.07, -0.03 |
|                           | 85-90        | 0.00          | 0.02        | -0.04, 0.03  | -0.04          | 0.01         | -0.06, -0.02 |
|                           | 91-96        | 0.00          | 0.02        | -0.04, 0.04  | -0.04          | 0.01         | -0.06, -0.02 |
| 97+                       | 0.00         | 0.02          | -0.03, 0.03 | -0.07        | 0.01           | -0.08, -0.05 |              |
| Sex                       | Male (ref)   | 0.00          |             |              | 0.00           |              |              |
|                           | Female       | -0.58         | 0.00        | -0.59, -0.58 | -0.57          | 0.00         | -0.58, -0.57 |
| Birth Order               | 2 (ref)      | 0.00          |             |              | 0.00           |              |              |
|                           | 3            | -0.02         | 0.01        | -0.04, -0.01 | -0.06          | 0.00         | -0.06, -0.05 |
|                           | 4            | -0.03         | 0.01        | -0.06, -0.01 | -0.09          | 0.01         | -0.10, -0.07 |
|                           | 5            | -0.05         | 0.02        | -0.09, -0.01 | -0.10          | 0.01         | -0.12, -0.08 |
|                           | 6            | -0.06         | 0.03        | -0.12, 0.00  | -0.10          | 0.02         | -0.13, -0.06 |
|                           | 7            | -0.08         | 0.04        | -0.16, -0.01 | -0.13          | 0.02         | -0.18, -0.09 |
|                           | Maternal Age | 15-19         | -0.03       | 0.03         | -0.08, 0.02    | -0.21        | 0.02         |
|                           | 20-24        | 0.00          | 0.01        | -0.02, 0.01  | -0.10          | 0.00         | -0.10, -0.09 |
|                           | 25-29 (ref)  | 0.00          |             |              | 0.00           |              |              |
|                           | 30-34        | 0.00          | 0.01        | -0.02, 0.01  | 0.05           | 0.00         | 0.05, 0.06   |
|                           | 35-39        | -0.01         | 0.02        | -0.04, 0.02  | 0.08           | 0.01         | 0.07, 0.09   |
|                           | 40-44        | -0.03         | 0.03        | -0.08, 0.02  | 0.10           | 0.01         | 0.08, 0.11   |
|                           | 45+          | -0.19         | 0.06        | -0.32, -0.07 | 0.03           | 0.03         | -0.03, 0.08  |
| Birth Year                | 1960         | -0.07         | 0.03        | -0.12, -0.01 | -0.06          | 0.01         | -0.07, -0.04 |
|                           | 1961         | -0.21         | 0.03        | -0.26, -0.16 | -0.18          | 0.01         | -0.20, -0.17 |
|                           | 1962         | -0.27         | 0.02        | -0.32, -0.23 | -0.25          | 0.01         | -0.27, -0.24 |
|                           | 1963         | -0.30         | 0.02        | -0.34, -0.26 | -0.28          | 0.01         | -0.30, -0.27 |
|                           | 1964         | -0.32         | 0.02        | -0.35, -0.28 | -0.31          | 0.01         | -0.32, -0.29 |
|                           | 1965         | -0.26         | 0.02        | -0.29, -0.22 | -0.25          | 0.01         | -0.27, -0.24 |
|                           | 1966         | -0.23         | 0.02        | -0.26, -0.20 | -0.22          | 0.01         | -0.24, -0.20 |
|                           | 1967         | -0.16         | 0.01        | -0.18, -0.13 | -0.15          | 0.01         | -0.17, -0.13 |
|                           | 1968         | -0.12         | 0.01        | -0.15, -0.10 | -0.12          | 0.01         | -0.14, -0.10 |
|                           | 1969         | -0.06         | 0.01        | -0.09, -0.04 | -0.05          | 0.01         | -0.07, -0.04 |
|                           | 1970 (ref)   | 0.00          |             |              | 0.00           |              |              |
|                           | 1971         | 0.05          | 0.01        | 0.02, 0.07   | 0.03           | 0.01         | 0.01, 0.05   |
|                           | 1972         | 0.05          | 0.01        | 0.02, 0.08   | 0.04           | 0.01         | 0.02, 0.06   |
|                           | 1973         | 0.05          | 0.01        | 0.02, 0.08   | 0.04           | 0.01         | 0.02, 0.05   |
|                           | 1974         | 0.07          | 0.02        | 0.04, 0.10   | 0.05           | 0.01         | 0.04, 0.07   |
|                           | 1975         | 0.11          | 0.02        | 0.08, 0.15   | 0.08           | 0.01         | 0.06, 0.10   |
|                           | 1976         | 0.15          | 0.02        | 0.11, 0.19   | 0.13           | 0.01         | 0.11, 0.15   |
|                           | 1977         | 0.20          | 0.02        | 0.15, 0.24   | 0.18           | 0.01         | 0.16, 0.20   |
|                           | 1978         | 0.23          | 0.02        | 0.19, 0.28   | 0.19           | 0.01         | 0.18, 0.21   |
| 1979                      | 0.22         | 0.03          | 0.17, 0.27  | 0.18         | 0.01           | 0.16, 0.20   |              |
| 1980                      | 0.23         | 0.03          | 0.18, 0.29  | 0.20         | 0.01           | 0.18, 0.22   |              |
| 1981                      | 0.25         | 0.03          | 0.19, 0.31  | 0.20         | 0.01           | 0.18, 0.22   |              |
| Sibling Group Size        | 3 (ref)      |               |             |              | 0.00           |              |              |
|                           | 4            |               |             |              | -0.04          | 0.00         | -0.05, -0.04 |
|                           | 5            |               |             |              | -0.11          | 0.01         | -0.13, -0.10 |
|                           | 6            |               |             |              | -0.15          | 0.01         | -0.18, -0.13 |
|                           | 7+           |               |             |              | -0.20          | 0.02         | -0.24, -0.17 |
| N                         |              | 467,451       |             |              | 467,451        |              |              |

TABLE S13. Results: Relationship Between Subsequent Birth Interval and Logged Income Averaged Over Ages 29-31 for Swedish Men and Women Born 1960-1981.

|                            |             | Within-family |             |              | Between-family |              |              |
|----------------------------|-------------|---------------|-------------|--------------|----------------|--------------|--------------|
|                            |             | Beta          | SE          | 95% CI       | Beta           | SE           | 95% CI       |
| Subsequent Interval Length | 6-12        | -0.01         | 0.02        | -0.05, 0.03  | -0.08          | 0.02         | -0.11, -0.05 |
|                            | 13-18       | 0.00          | 0.01        | -0.02, 0.02  | -0.03          | 0.01         | -0.04, -0.02 |
|                            | 19-24       | -0.01         | 0.01        | -0.03, 0.00  | -0.02          | 0.01         | -0.03, -0.01 |
|                            | 25-30 (ref) | 0.00          |             |              | 0.00           |              |              |
|                            | 31-36       | 0.00          | 0.01        | -0.02, 0.01  | 0.01           | 0.01         | 0.00, 0.02   |
|                            | 37-42       | -0.01         | 0.01        | -0.03, 0.01  | -0.01          | 0.01         | -0.02, 0.00  |
|                            | 43-48       | 0.02          | 0.01        | 0.00, 0.03   | 0.01           | 0.01         | 0.00, 0.02   |
|                            | 49-54       | -0.01         | 0.01        | -0.03, 0.01  | -0.01          | 0.01         | -0.02, 0.00  |
|                            | 55-60       | 0.01          | 0.01        | -0.02, 0.03  | 0.00           | 0.01         | -0.02, 0.01  |
|                            | 61-66       | 0.02          | 0.01        | -0.01, 0.04  | -0.01          | 0.01         | -0.02, 0.01  |
|                            | 67-72       | 0.00          | 0.01        | -0.03, 0.02  | -0.01          | 0.01         | -0.03, 0.01  |
|                            | 73-78       | 0.00          | 0.01        | -0.03, 0.03  | 0.00           | 0.01         | -0.02, 0.01  |
|                            | 79-84       | 0.01          | 0.01        | -0.02, 0.04  | -0.01          | 0.01         | -0.03, 0.01  |
|                            | 85-90       | 0.02          | 0.02        | -0.01, 0.05  | 0.00           | 0.01         | -0.02, 0.02  |
|                            | 91-96       | 0.00          | 0.02        | -0.04, 0.03  | -0.02          | 0.01         | -0.04, 0.00  |
| 97+                        | 0.01        | 0.01          | -0.01, 0.03 | -0.03        | 0.01           | -0.05, -0.02 |              |
| Sex                        | Male (ref)  | 0.00          |             |              | 0.00           |              |              |
|                            | Female      | -0.60         | 0.00        | -0.60, -0.59 | -0.57          | 0.00         | -0.58, -0.57 |
| Birth Order                | 1           | 0.04          | 0.01        | 0.03, 0.06   | 0.06           | 0.00         | 0.05, 0.06   |
|                            | 2 (ref)     | 0.00          |             |              | 0.00           |              |              |
|                            | 3           | -0.03         | 0.01        | -0.05, -0.01 | -0.04          | 0.01         | -0.05, -0.03 |
|                            | 4           | -0.06         | 0.02        | -0.10, -0.02 | -0.05          | 0.01         | -0.08, -0.03 |
|                            | 5           | -0.09         | 0.03        | -0.15, -0.03 | -0.06          | 0.02         | -0.10, -0.02 |
|                            | 6           | -0.13         | 0.04        | -0.22, -0.05 | -0.06          | 0.03         | -0.12, 0.00  |
| Maternal Age               | 15-19       | -0.02         | 0.01        | -0.04, 0.01  | -0.20          | 0.01         | -0.21, -0.19 |
|                            | 20-24       | -0.01         | 0.01        | -0.02, 0.01  | -0.09          | 0.00         | -0.10, -0.08 |
|                            | 25-29 (ref) | 0.00          |             |              | 0.00           |              |              |
|                            | 30-34       | 0.00          | 0.01        | -0.02, 0.02  | 0.02           | 0.00         | 0.01, 0.03   |
|                            | 35-39       | 0.00          | 0.02        | -0.05, 0.04  | 0.01           | 0.01         | -0.01, 0.03  |
|                            | 40-44       | 0.00          | 0.07        | -0.14, 0.13  | 0.04           | 0.03         | -0.02, 0.11  |
|                            | 45+         | -0.80         | 0.61        | -2.00, 0.41  | -0.18          | 0.26         | -0.70, 0.33  |
| Birth Year                 | 1960        | -0.14         | 0.03        | -0.20, -0.08 | -0.07          | 0.01         | -0.09, -0.06 |
|                            | 1961        | -0.28         | 0.03        | -0.33, -0.22 | -0.21          | 0.01         | -0.23, -0.19 |
|                            | 1962        | -0.34         | 0.02        | -0.39, -0.29 | -0.28          | 0.01         | -0.30, -0.26 |
|                            | 1963        | -0.35         | 0.02        | -0.39, -0.31 | -0.29          | 0.01         | -0.31, -0.28 |
|                            | 1964        | -0.37         | 0.02        | -0.41, -0.33 | -0.32          | 0.01         | -0.34, -0.31 |
|                            | 1965        | -0.31         | 0.02        | -0.34, -0.27 | -0.26          | 0.01         | -0.28, -0.25 |
|                            | 1966        | -0.28         | 0.02        | -0.31, -0.25 | -0.24          | 0.01         | -0.25, -0.22 |
|                            | 1967        | -0.20         | 0.01        | -0.23, -0.18 | -0.17          | 0.01         | -0.19, -0.15 |
|                            | 1968        | -0.14         | 0.01        | -0.17, -0.12 | -0.13          | 0.01         | -0.15, -0.11 |
|                            | 1969        | -0.07         | 0.01        | -0.09, -0.04 | -0.07          | 0.01         | -0.09, -0.05 |
|                            | 1970 (ref)  | 0.00          |             |              | 0.00           |              |              |
|                            | 1971        | 0.03          | 0.01        | 0.00, 0.05   | 0.02           | 0.01         | 0.00, 0.04   |
|                            | 1972        | 0.04          | 0.01        | 0.01, 0.06   | 0.03           | 0.01         | 0.02, 0.05   |
|                            | 1973        | 0.04          | 0.01        | 0.02, 0.07   | 0.03           | 0.01         | 0.01, 0.05   |
|                            | 1974        | 0.06          | 0.02        | 0.03, 0.10   | 0.04           | 0.01         | 0.02, 0.06   |
|                            | 1975        | 0.11          | 0.02        | 0.08, 0.15   | 0.08           | 0.01         | 0.06, 0.09   |
|                            | 1976        | 0.14          | 0.02        | 0.10, 0.18   | 0.11           | 0.01         | 0.09, 0.13   |
|                            | 1977        | 0.21          | 0.02        | 0.17, 0.25   | 0.16           | 0.01         | 0.14, 0.17   |
| 1978                       | 0.22        | 0.02          | 0.17, 0.27  | 0.16         | 0.01           | 0.14, 0.18   |              |
| 1979                       | 0.23        | 0.03          | 0.18, 0.28  | 0.15         | 0.01           | 0.13, 0.17   |              |
| 1980                       | 0.27        | 0.03          | 0.21, 0.33  | 0.17         | 0.01           | 0.15, 0.19   |              |
| 1981                       | 0.28        | 0.03          | 0.22, 0.34  | 0.17         | 0.01           | 0.15, 0.19   |              |
| Sibling Group Size         | 3 (ref)     |               |             |              | 0.00           |              |              |
|                            | 4           |               |             |              | -0.06          | 0.00         | -0.07, -0.05 |
|                            | 5           |               |             |              | -0.13          | 0.01         | -0.15, -0.11 |
|                            | 6           |               |             |              | -0.17          | 0.01         | -0.20, -0.15 |
|                            | 7+          |               |             |              | -0.22          | 0.02         | -0.25, -0.18 |
| N                          |             | 437,383       |             |              | 437,383        |              |              |

TABLE S14. Results: Relationship Between Preceding Birth Interval and Probability of Unemployment Over Ages 29-31 for Swedish Men and Women Born 1960-1981.

|                           |              | Within-family |                |                | Between-family |                |                |
|---------------------------|--------------|---------------|----------------|----------------|----------------|----------------|----------------|
|                           |              | Beta          | SE             | 95% CI         | Beta           | SE             | 95% CI         |
| Preceding Interval Length | 6-12         | -0.016        | 0.008          | -0.032, 0.000  | 0.005          | 0.006          | -0.008, 0.018  |
|                           | 13-18        | -0.001        | 0.004          | -0.009, 0.006  | 0.002          | 0.003          | -0.004, 0.007  |
|                           | 19-24        | 0.001         | 0.003          | -0.005, 0.008  | -0.002         | 0.002          | -0.007, 0.003  |
|                           | 25-30 (ref)  |               |                |                | 0.000          |                |                |
|                           | 31-36        | 0.000         | 0.003          | -0.007, 0.006  | 0.002          | 0.002          | -0.003, 0.006  |
|                           | 37-42        | 0.003         | 0.004          | -0.005, 0.010  | 0.006          | 0.003          | 0.001, 0.011   |
|                           | 43-48        | -0.002        | 0.004          | -0.009, 0.006  | 0.008          | 0.003          | 0.003, 0.013   |
|                           | 49-54        | 0.004         | 0.004          | -0.005, 0.012  | 0.013          | 0.003          | 0.008, 0.019   |
|                           | 55-60        | 0.002         | 0.005          | -0.007, 0.011  | 0.016          | 0.003          | 0.01, 0.022    |
|                           | 61-66        | 0.004         | 0.005          | -0.007, 0.014  | 0.016          | 0.003          | 0.009, 0.022   |
|                           | 67-72        | 0.002         | 0.006          | -0.009, 0.013  | 0.019          | 0.004          | 0.012, 0.026   |
|                           | 73-78        | -0.010        | 0.006          | -0.022, 0.003  | 0.011          | 0.004          | 0.003, 0.018   |
|                           | 79-84        | 0.007         | 0.007          | -0.007, 0.021  | 0.027          | 0.004          | 0.018, 0.035   |
|                           | 85-90        | -0.014        | 0.008          | -0.029, 0.002  | 0.014          | 0.005          | 0.005, 0.023   |
| 91-96                     | 0.014        | 0.009         | -0.003, 0.030  | 0.030          | 0.005          | 0.02, 0.039    |                |
| 97+                       | -0.004       | 0.007         | -0.016, 0.009  | 0.030          | 0.003          | 0.024, 0.036   |                |
| Sex                       | Male (ref)   |               |                |                | 0.000          |                |                |
|                           | Female       | 0.067         | 0.002          | 0.063, 0.07    | 0.060          | 0.001          | 0.057, 0.062   |
| Birth Order               | 2 (ref)      |               |                |                | 0.000          |                |                |
|                           | 3            | 0.019         | 0.003          | 0.013, 0.025   | 0.028          | 0.001          | 0.025, 0.031   |
|                           | 4            | 0.029         | 0.006          | 0.017, 0.041   | 0.047          | 0.003          | 0.042, 0.052   |
|                           | 5            | 0.035         | 0.009          | 0.017, 0.054   | 0.062          | 0.005          | 0.053, 0.071   |
|                           | 6            | 0.028         | 0.013          | 0.003, 0.053   | 0.071          | 0.007          | 0.057, 0.086   |
|                           | 7            | 0.035         | 0.017          | 0.002, 0.069   | 0.094          | 0.010          | 0.075, 0.113   |
|                           | Maternal Age | 15-19         | -0.001         | 0.011          | -0.023, 0.021  | 0.086          | 0.008          |
|                           | 20-24        | -0.002        | 0.004          | -0.010, 0.005  | 0.044          | 0.002          | 0.041, 0.048   |
|                           | 25-29 (ref)  |               |                |                | 0.000          |                |                |
|                           | 30-34        | 0.007         | 0.004          | 0.000, 0.014   | -0.027         | 0.002          | -0.03, -0.023  |
|                           | 35-39        | 0.014         | 0.007          | 0.001, 0.027   | -0.040         | 0.002          | -0.045, -0.036 |
|                           | 40-44        | 0.020         | 0.011          | -0.002, 0.041  | -0.049         | 0.004          | -0.057, -0.042 |
|                           | 45+          | 0.068         | 0.027          | 0.015, 0.12    | -0.060         | 0.011          | -0.081, -0.039 |
| Birth Year                | 1960         | -0.121        | 0.012          | -0.144, -0.099 | -0.151         | 0.004          | -0.158, -0.144 |
|                           | 1961         | -0.044        | 0.011          | -0.065, -0.023 | -0.070         | 0.004          | -0.078, -0.063 |
|                           | 1962         | 0.011         | 0.010          | -0.008, 0.03   | -0.007         | 0.004          | -0.015, 0.000  |
|                           | 1963         | 0.055         | 0.009          | 0.038, 0.073   | 0.031          | 0.004          | 0.023, 0.038   |
|                           | 1964         | 0.081         | 0.008          | 0.066, 0.097   | 0.063          | 0.004          | 0.055, 0.071   |
|                           | 1965         | 0.073         | 0.007          | 0.059, 0.087   | 0.061          | 0.004          | 0.053, 0.069   |
|                           | 1966         | 0.062         | 0.006          | 0.05, 0.075    | 0.052          | 0.004          | 0.044, 0.06    |
|                           | 1967         | 0.048         | 0.006          | 0.037, 0.06    | 0.042          | 0.004          | 0.034, 0.05    |
|                           | 1968         | 0.036         | 0.006          | 0.026, 0.047   | 0.034          | 0.004          | 0.025, 0.042   |
|                           | 1969         | 0.022         | 0.005          | 0.012, 0.033   | 0.019          | 0.004          | 0.011, 0.027   |
|                           | 1970 (ref)   |               |                |                | 0.000          |                |                |
|                           | 1971         | -0.022        | 0.005          | -0.033, -0.011 | -0.015         | 0.004          | -0.023, -0.006 |
|                           | 1972         | -0.028        | 0.006          | -0.039, -0.017 | -0.021         | 0.004          | -0.029, -0.013 |
|                           | 1973         | -0.032        | 0.006          | -0.044, -0.02  | -0.022         | 0.004          | -0.03, -0.013  |
|                           | 1974         | -0.043        | 0.007          | -0.056, -0.029 | -0.024         | 0.004          | -0.032, -0.016 |
|                           | 1975         | -0.052        | 0.008          | -0.067, -0.037 | -0.031         | 0.004          | -0.039, -0.023 |
|                           | 1976         | -0.078        | 0.008          | -0.095, -0.062 | -0.058         | 0.004          | -0.066, -0.050 |
|                           | 1977         | -0.108        | 0.009          | -0.126, -0.090 | -0.081         | 0.004          | -0.089, -0.073 |
|                           | 1978         | -0.128        | 0.010          | -0.148, -0.108 | -0.099         | 0.004          | -0.107, -0.091 |
| 1979                      | -0.146       | 0.011         | -0.168, -0.125 | -0.117         | 0.004          | -0.124, -0.109 |                |
| 1980                      | -0.161       | 0.012         | -0.184, -0.137 | -0.122         | 0.004          | -0.13, -0.115  |                |
| 1981                      | -0.179       | 0.013         | -0.204, -0.153 | -0.131         | 0.004          | -0.138, -0.123 |                |
| Sibling Group Size        | 3 (ref)      |               |                |                | 0.000          |                |                |
|                           | 4            |               |                |                | 0.008          | 0.002          | 0.005, 0.011   |
|                           | 5            |               |                |                | 0.019          | 0.003          | 0.013, 0.026   |
|                           | 6            |               |                |                | 0.033          | 0.005          | 0.024, 0.043   |
|                           | 7+           |               |                |                | 0.028          | 0.007          | 0.015, 0.042   |
| N                         |              | 510,784       |                |                | 510,784        |                |                |

TABLE S15. Results: Relationship Between Subsequent Birth Interval and Probability of Unemployment Over Ages 29-31 for Swedish Men and Women Born 1960-1981.

|                            |             | Within-family |                |                | Between-family |                |                |
|----------------------------|-------------|---------------|----------------|----------------|----------------|----------------|----------------|
|                            |             | Beta          | SE             | 95% CI         | Beta           | SE             | 95% CI         |
| Subsequent Interval Length | 6-12        | -0.004        | 0.008          | -0.020, 0.012  | 0.020          | 0.007          | 0.007, 0.033   |
|                            | 13-18       | -0.005        | 0.004          | -0.012, 0.003  | 0.005          | 0.003          | 0.000, 0.011   |
|                            | 19-24       | -0.001        | 0.003          | -0.008, 0.005  | 0.002          | 0.002          | -0.003, 0.006  |
|                            | 25-30 (ref) | 0.000         |                |                | 0.000          |                |                |
|                            | 31-36       | -0.004        | 0.003          | -0.011, 0.003  | -0.003         | 0.002          | -0.008, 0.001  |
|                            | 37-42       | 0.002         | 0.004          | -0.005, 0.009  | 0.002          | 0.003          | -0.003, 0.007  |
|                            | 43-48       | 0.002         | 0.004          | -0.006, 0.009  | 0.003          | 0.003          | -0.002, 0.008  |
|                            | 49-54       | 0.000         | 0.004          | -0.009, 0.008  | 0.001          | 0.003          | -0.005, 0.007  |
|                            | 55-60       | 0.004         | 0.005          | -0.005, 0.013  | 0.009          | 0.003          | 0.003, 0.015   |
|                            | 61-66       | -0.001        | 0.005          | -0.010, 0.009  | 0.005          | 0.003          | -0.002, 0.011  |
|                            | 67-72       | -0.007        | 0.005          | -0.018, 0.003  | 0.002          | 0.004          | -0.005, 0.009  |
|                            | 73-78       | 0.001         | 0.006          | -0.01, 0.013   | 0.007          | 0.004          | -0.001, 0.015  |
|                            | 79-84       | 0.007         | 0.006          | -0.006, 0.019  | 0.010          | 0.004          | 0.001, 0.018   |
|                            | 85-90       | 0.018         | 0.007          | 0.004, 0.031   | 0.017          | 0.005          | 0.008, 0.027   |
|                            | 91-96       | -0.003        | 0.007          | -0.017, 0.012  | 0.008          | 0.005          | -0.002, 0.019  |
| 97+                        | 0.000       | 0.004         | -0.008, 0.009  | 0.016          | 0.003          | 0.01, 0.022    |                |
| Sex                        | Male (ref)  | 0.000         |                |                | 0.000          |                |                |
|                            | Female      | 0.065         | 0.002          | 0.061, 0.068   | 0.058          | 0.001          | 0.056, 0.06    |
| Birth Order                | 1           | -0.016        | 0.003          | -0.023, -0.010 | -0.028         | 0.001          | -0.031, -0.025 |
|                            | 2 (ref)     | 0.000         |                |                | 0.000          |                |                |
|                            | 3           | 0.012         | 0.004          | 0.004, 0.02    | 0.024          | 0.003          | 0.019, 0.029   |
|                            | 4           | 0.012         | 0.008          | -0.004, 0.028  | 0.040          | 0.005          | 0.031, 0.05    |
|                            | 5           | 0.023         | 0.012          | -0.002, 0.047  | 0.056          | 0.008          | 0.04, 0.071    |
|                            | 6           | 0.001         | 0.018          | -0.034, 0.037  | 0.063          | 0.012          | 0.039, 0.088   |
| Maternal Age               | 15-19       | 0.000         | 0.006          | -0.011, 0.012  | 0.089          | 0.003          | 0.084, 0.095   |
|                            | 20-24       | -0.002        | 0.003          | -0.009, 0.004  | 0.041          | 0.001          | 0.038, 0.044   |
|                            | 25-29 (ref) | 0.000         |                |                | 0.000          |                |                |
|                            | 30-34       | 0.007         | 0.004          | -0.001, 0.015  | -0.013         | 0.002          | -0.017, -0.009 |
|                            | 35-39       | 0.016         | 0.009          | -0.001, 0.034  | -0.010         | 0.004          | -0.019, -0.002 |
|                            | 40-44       | 0.019         | 0.029          | -0.037, 0.076  | -0.028         | 0.014          | -0.056, 0.000  |
| 45+                        | 0.453       | 0.281         | -0.097, 1.003  | 0.218          | 0.160          | -0.095, 0.532  |                |
| Birth Year                 | 1960        | -0.132        | 0.013          | -0.157, -0.107 | -0.140         | 0.004          | -0.147, -0.133 |
|                            | 1961        | -0.046        | 0.012          | -0.069, -0.023 | -0.058         | 0.004          | -0.066, -0.051 |
|                            | 1962        | 0.007         | 0.010          | -0.013, 0.028  | -0.001         | 0.004          | -0.009, 0.007  |
|                            | 1963        | 0.043         | 0.009          | 0.025, 0.062   | 0.037          | 0.004          | 0.029, 0.045   |
|                            | 1964        | 0.075         | 0.008          | 0.059, 0.092   | 0.067          | 0.004          | 0.059, 0.076   |
|                            | 1965        | 0.072         | 0.008          | 0.058, 0.087   | 0.066          | 0.004          | 0.058, 0.074   |
|                            | 1966        | 0.070         | 0.007          | 0.057, 0.084   | 0.064          | 0.004          | 0.056, 0.073   |
|                            | 1967        | 0.060         | 0.006          | 0.048, 0.071   | 0.053          | 0.004          | 0.045, 0.061   |
|                            | 1968        | 0.040         | 0.006          | 0.029, 0.05    | 0.037          | 0.004          | 0.029, 0.046   |
|                            | 1969        | 0.021         | 0.005          | 0.01, 0.031    | 0.021          | 0.004          | 0.012, 0.029   |
|                            | 1970 (ref)  | 0.000         |                |                | 0.000          |                |                |
|                            | 1971        | -0.018        | 0.005          | -0.029, -0.007 | -0.010         | 0.004          | -0.019, -0.002 |
|                            | 1972        | -0.026        | 0.006          | -0.037, -0.015 | -0.019         | 0.004          | -0.028, -0.011 |
|                            | 1973        | -0.031        | 0.006          | -0.043, -0.019 | -0.021         | 0.004          | -0.029, -0.012 |
|                            | 1974        | -0.036        | 0.007          | -0.049, -0.023 | -0.023         | 0.004          | -0.032, -0.015 |
|                            | 1975        | -0.046        | 0.008          | -0.061, -0.031 | -0.026         | 0.004          | -0.035, -0.018 |
|                            | 1976        | -0.063        | 0.008          | -0.08, -0.047  | -0.046         | 0.004          | -0.054, -0.038 |
|                            | 1977        | -0.093        | 0.009          | -0.112, -0.075 | -0.067         | 0.004          | -0.075, -0.059 |
| 1978                       | -0.117      | 0.010         | -0.137, -0.097 | -0.087         | 0.004          | -0.094, -0.079 |                |
| 1979                       | -0.140      | 0.011         | -0.162, -0.118 | -0.105         | 0.004          | -0.112, -0.097 |                |
| 1980                       | -0.150      | 0.012         | -0.174, -0.126 | -0.110         | 0.004          | -0.117, -0.102 |                |
| 1981                       | -0.168      | 0.013         | -0.194, -0.142 | -0.115         | 0.004          | -0.123, -0.107 |                |
| Sibling Group Size         | 3 (ref)     |               |                |                | 0.000          |                |                |
|                            | 4           |               |                |                | 0.011          | 0.002          | 0.008, 0.015   |
|                            | 5           |               |                |                | 0.022          | 0.003          | 0.016, 0.028   |
|                            | 6           |               |                |                | 0.039          | 0.005          | 0.028, 0.049   |
|                            | 7+          |               |                |                | 0.031          | 0.007          | 0.017, 0.046   |
| N                          |             | 479,567       |                |                | 479,567        |                |                |

TABLE S16. Results: Relationship Between Preceding Birth Interval and Probability of Receiving Welfare Support Over Ages 29-31 for Swedish Men and Women Born 1960-1981.

|                           |             | Within-family |               |                | Between-family |              |                |
|---------------------------|-------------|---------------|---------------|----------------|----------------|--------------|----------------|
|                           |             | Beta          | SE            | 95% CI         | Beta           | SE           | 95% CI         |
| Preceding Interval Length | 6-12        | 0.003         | 0.005         | -0.006, 0.013  | 0.025          | 0.005        | 0.016, 0.034   |
|                           | 13-18       | -0.002        | 0.002         | -0.006, 0.003  | 0.006          | 0.002        | 0.002, 0.009   |
|                           | 19-24       | -0.001        | 0.002         | -0.005, 0.003  | 0.000          | 0.001        | -0.003, 0.003  |
|                           | 25-30 (ref) | 0.000         |               |                | 0.000          |              |                |
|                           | 31-36       | 0.000         | 0.002         | -0.004, 0.003  | -0.001         | 0.001        | -0.003, 0.002  |
|                           | 37-42       | -0.002        | 0.002         | -0.006, 0.002  | -0.001         | 0.001        | -0.004, 0.001  |
|                           | 43-48       | 0.001         | 0.002         | -0.004, 0.005  | 0.001          | 0.002        | -0.002, 0.004  |
|                           | 49-54       | 0.003         | 0.002         | -0.002, 0.007  | 0.005          | 0.002        | 0.002, 0.009   |
|                           | 55-60       | 0.002         | 0.003         | -0.004, 0.007  | 0.005          | 0.002        | 0.002, 0.009   |
|                           | 61-66       | 0.002         | 0.003         | -0.004, 0.008  | 0.005          | 0.002        | 0.002, 0.009   |
|                           | 67-72       | -0.001        | 0.003         | -0.007, 0.006  | 0.007          | 0.002        | 0.003, 0.011   |
|                           | 73-78       | -0.001        | 0.004         | -0.008, 0.006  | 0.006          | 0.002        | 0.002, 0.01    |
|                           | 79-84       | -0.002        | 0.004         | -0.009, 0.006  | 0.005          | 0.002        | 0.001, 0.01    |
|                           | 85-90       | 0.001         | 0.004         | -0.008, 0.010  | 0.012          | 0.003        | 0.006, 0.017   |
|                           | 91-96       | -0.005        | 0.005         | -0.015, 0.004  | 0.012          | 0.003        | 0.006, 0.017   |
| 97+                       | 0.000       | 0.004         | -0.007, 0.007 | 0.020          | 0.002          | 0.016, 0.023 |                |
| Sex                       | Male (ref)  | 0.000         |               |                | 0.000          |              |                |
|                           | Female      | 0.008         | 0.001         | 0.007, 0.010   | 0.007          | 0.001        | 0.006, 0.009   |
| Birth Order               | 2 (ref)     | 0.000         |               |                | 0.00           |              |                |
|                           | 3           | 0.005         | 0.002         | 0.002, 0.009   | 0.017          | 0.001        | 0.015, 0.019   |
|                           | 4           | 0.004         | 0.004         | -0.003, 0.011  | 0.029          | 0.002        | 0.025, 0.032   |
|                           | 5           | -0.002        | 0.005         | -0.013, 0.008  | 0.031          | 0.003        | 0.025, 0.037   |
|                           | 6           | -0.009        | 0.007         | -0.024, 0.005  | 0.032          | 0.005        | 0.021, 0.042   |
|                           | 7           | -0.025        | 0.010         | -0.044, -0.005 | 0.031          | 0.007        | 0.016, 0.045   |
| Maternal Age              | 15-19       | 0.021         | 0.006         | 0.009, 0.034   | 0.090          | 0.006        | 0.078, 0.102   |
|                           | 20-24       | 0.001         | 0.002         | -0.003, 0.005  | 0.032          | 0.001        | 0.030, 0.034   |
|                           | 25-29 (ref) | 0.000         |               |                | 0.000          |              |                |
|                           | 30-34       | 0.004         | 0.002         | 0.000, 0.008   | -0.018         | 0.001        | -0.02, -0.016  |
|                           | 35-39       | 0.013         | 0.004         | 0.005, 0.02    | -0.031         | 0.001        | -0.034, -0.029 |
|                           | 40-44       | 0.021         | 0.006         | 0.008, 0.033   | -0.043         | 0.002        | -0.047, -0.038 |
|                           | 45+         | 0.022         | 0.015         | -0.008, 0.052  | -0.058         | 0.006        | -0.07, -0.045  |
| Birth Year                | 1960        | 0.051         | 0.007         | 0.038, 0.064   | 0.035          | 0.002        | 0.031, 0.04    |
|                           | 1961        | 0.055         | 0.006         | 0.043, 0.067   | 0.042          | 0.002        | 0.037, 0.046   |
|                           | 1962        | 0.065         | 0.006         | 0.054, 0.076   | 0.051          | 0.002        | 0.046, 0.056   |
|                           | 1963        | 0.062         | 0.005         | 0.052, 0.072   | 0.048          | 0.002        | 0.044, 0.053   |
|                           | 1964        | 0.061         | 0.005         | 0.052, 0.07    | 0.049          | 0.002        | 0.045, 0.054   |
|                           | 1965        | 0.054         | 0.004         | 0.046, 0.062   | 0.047          | 0.002        | 0.042, 0.051   |
|                           | 1966        | 0.052         | 0.004         | 0.045, 0.06    | 0.040          | 0.002        | 0.036, 0.044   |
|                           | 1967        | 0.038         | 0.003         | 0.031, 0.044   | 0.032          | 0.002        | 0.027, 0.036   |
|                           | 1968        | 0.026         | 0.003         | 0.02, 0.032    | 0.017          | 0.002        | 0.013, 0.021   |
|                           | 1969        | 0.013         | 0.003         | 0.007, 0.019   | 0.007          | 0.002        | 0.003, 0.012   |
|                           | 1970 (ref)  | 0.000         |               |                | 0.000          |              |                |
|                           | 1971        | -0.008        | 0.003         | -0.014, -0.002 | -0.006         | 0.002        | -0.01, -0.002  |
|                           | 1972        | -0.007        | 0.003         | -0.013, -0.001 | -0.009         | 0.002        | -0.013, -0.006 |
|                           | 1973        | -0.016        | 0.004         | -0.023, -0.009 | -0.010         | 0.002        | -0.014, -0.006 |
|                           | 1974        | -0.014        | 0.004         | -0.022, -0.007 | -0.009         | 0.002        | -0.013, -0.005 |
|                           | 1975        | -0.020        | 0.004         | -0.029, -0.012 | -0.010         | 0.002        | -0.014, -0.006 |
|                           | 1976        | -0.022        | 0.005         | -0.031, -0.013 | -0.014         | 0.002        | -0.018, -0.010 |
|                           | 1977        | -0.025        | 0.005         | -0.035, -0.014 | -0.015         | 0.002        | -0.019, -0.011 |
|                           | 1978        | -0.027        | 0.006         | -0.039, -0.016 | -0.014         | 0.002        | -0.018, -0.010 |
|                           | 1979        | -0.029        | 0.006         | -0.042, -0.017 | -0.013         | 0.002        | -0.016, -0.009 |
|                           | 1980        | -0.030        | 0.007         | -0.043, -0.016 | -0.011         | 0.002        | -0.015, -0.007 |
|                           | 1981        | -0.030        | 0.007         | -0.044, -0.016 | -0.009         | 0.002        | -0.013, -0.005 |
| Sibling Group Size        | 3 (ref)     |               |               |                | 0.000          |              |                |
|                           | 4           |               |               |                | 0.011          | 0.001        | 0.009, 0.013   |
|                           | 5           |               |               |                | 0.032          | 0.002        | 0.028, 0.037   |
|                           | 6           |               |               |                | 0.057          | 0.004        | 0.048, 0.065   |
|                           | 7+          |               |               |                | 0.072          | 0.006        | 0.06, 0.083    |
| N                         |             | 510,784       |               |                | 510,784        |              |                |



TABLE S17. Results: Relationship Between Subsequent Birth Interval and Probability of Receiving Welfare Support Over Ages 29-31 for Swedish Men and Women Born 1960-1981.

|                            |             | Within-family |                |                | Between-family |                |                |
|----------------------------|-------------|---------------|----------------|----------------|----------------|----------------|----------------|
|                            |             | Beta          | SE             | 95% CI         | Beta           | SE             | 95% CI         |
| Subsequent Interval Length | 6-12        | 0.007         | 0.005          | -0.002, 0.016  | 0.035          | 0.005          | 0.026, 0.045   |
|                            | 13-18       | 0.003         | 0.002          | -0.002, 0.007  | 0.013          | 0.002          | 0.009, 0.016   |
|                            | 19-24       | 0.004         | 0.002          | 0, 0.008       | 0.004          | 0.001          | 0.001, 0.007   |
|                            | 25-30 (ref) | 0.000         |                |                | 0.00           |                |                |
|                            | 31-36       | 0.002         | 0.002          | -0.002, 0.006  | -0.001         | 0.001          | -0.004, 0.001  |
|                            | 37-42       | 0.001         | 0.002          | -0.003, 0.005  | -0.001         | 0.001          | -0.004, 0.002  |
|                            | 43-48       | 0.003         | 0.002          | -0.001, 0.007  | 0.000          | 0.002          | -0.003, 0.003  |
|                            | 49-54       | 0.002         | 0.002          | -0.003, 0.007  | 0.000          | 0.002          | -0.003, 0.004  |
|                            | 55-60       | 0.004         | 0.003          | -0.001, 0.010  | 0.001          | 0.002          | -0.003, 0.004  |
|                            | 61-66       | -0.001        | 0.003          | -0.006, 0.005  | -0.001         | 0.002          | -0.005, 0.003  |
|                            | 67-72       | 0.002         | 0.003          | -0.004, 0.008  | 0.002          | 0.002          | -0.002, 0.006  |
|                            | 73-78       | 0.004         | 0.003          | -0.003, 0.010  | 0.003          | 0.002          | -0.001, 0.008  |
|                            | 79-84       | 0.000         | 0.004          | -0.007, 0.007  | -0.001         | 0.002          | -0.006, 0.004  |
|                            | 85-90       | 0.005         | 0.004          | -0.002, 0.013  | 0.006          | 0.003          | 0.000, 0.011   |
| Sex                        | 91-96       | 0.000         | 0.004          | -0.008, 0.009  | 0.005          | 0.003          | -0.001, 0.011  |
|                            | 97+         | 0.006         | 0.003          | 0.001, 0.011   | 0.006          | 0.002          | 0.003, 0.010   |
| Birth Order                | Male (ref)  | 0.000         |                |                | 0.000          |                |                |
|                            | Female      | 0.008         | 0.001          | 0.006, 0.010   | 0.005          | 0.001          | 0.004, 0.007   |
| Maternal Age               | 1           | -0.009        | 0.002          | -0.013, -0.005 | -0.014         | 0.001          | -0.015, -0.012 |
|                            | 2 (ref)     | 0.000         |                |                | 0.000          |                |                |
|                            | 3           | 0.007         | 0.002          | 0.002, 0.011   | 0.013          | 0.002          | 0.010, 0.017   |
|                            | 4           | 0.003         | 0.005          | -0.006, 0.012  | 0.018          | 0.003          | 0.011, 0.025   |
|                            | 5           | -0.002        | 0.007          | -0.016, 0.012  | 0.020          | 0.006          | 0.008, 0.031   |
|                            | 6           | 0.011         | 0.010          | -0.01, 0.031   | 0.040          | 0.010          | 0.021, 0.059   |
| Birth Year                 | 15-19       | 0.003         | 0.003          | -0.004, 0.009  | 0.067          | 0.002          | 0.063, 0.071   |
|                            | 20-24       | -0.002        | 0.002          | -0.006, 0.001  | 0.026          | 0.001          | 0.024, 0.028   |
|                            | 25-29 (ref) | 0.000         |                |                | 0.000          |                |                |
|                            | 30-34       | 0.005         | 0.002          | 0.001, 0.009   | -0.012         | 0.001          | -0.014, -0.010 |
|                            | 35-39       | 0.015         | 0.005          | 0.004, 0.025   | -0.017         | 0.003          | -0.022, -0.012 |
|                            | 40-44       | 0.063         | 0.016          | 0.031, 0.095   | -0.029         | 0.009          | -0.048, -0.011 |
| Sibling Group Size         | 45+         | -0.087        | 0.161          | -0.402, 0.228  | -0.122         | 0.016          | -0.155, -0.090 |
|                            | 3 (ref)     | 0.000         |                |                | 0.000          |                |                |
|                            | 4           | 0.071         | 0.007          | 0.057, 0.085   | 0.035          | 0.002          | 0.030, 0.039   |
|                            | 5           | 0.076         | 0.007          | 0.063, 0.089   | 0.043          | 0.002          | 0.038, 0.048   |
|                            | 6           | 0.084         | 0.006          | 0.073, 0.096   | 0.052          | 0.002          | 0.047, 0.057   |
|                            | 7           | 0.079         | 0.005          | 0.068, 0.089   | 0.049          | 0.002          | 0.044, 0.054   |
|                            | 8           | 0.075         | 0.005          | 0.065, 0.084   | 0.052          | 0.002          | 0.048, 0.057   |
|                            | 9           | 0.065         | 0.004          | 0.057, 0.074   | 0.046          | 0.002          | 0.041, 0.051   |
|                            | 10          | 0.059         | 0.004          | 0.052, 0.067   | 0.041          | 0.002          | 0.036, 0.045   |
|                            | 11          | 0.045         | 0.003          | 0.039, 0.052   | 0.034          | 0.002          | 0.029, 0.039   |
|                            | 12          | 0.032         | 0.003          | 0.026, 0.038   | 0.021          | 0.002          | 0.017, 0.026   |
|                            | 13          | 0.014         | 0.003          | 0.008, 0.020   | 0.011          | 0.002          | 0.007, 0.016   |
|                            | 14          | 0.000         |                |                | 0.000          |                |                |
|                            | 15          | -0.007        | 0.003          | -0.013, -0.001 | -0.005         | 0.002          | -0.009, -0.001 |
|                            | 16          | -0.012        | 0.003          | -0.018, -0.005 | -0.007         | 0.002          | -0.011, -0.003 |
|                            | 17          | -0.018        | 0.004          | -0.025, -0.012 | -0.007         | 0.002          | -0.011, -0.003 |
|                            | 18          | -0.024        | 0.004          | -0.031, -0.016 | -0.008         | 0.002          | -0.012, -0.004 |
|                            | 19          | -0.025        | 0.004          | -0.034, -0.017 | -0.007         | 0.002          | -0.011, -0.003 |
|                            | 20          | -0.032        | 0.005          | -0.042, -0.023 | -0.010         | 0.002          | -0.014, -0.006 |
|                            | 21          | -0.035        | 0.005          | -0.046, -0.025 | -0.009         | 0.002          | -0.013, -0.005 |
| 22                         | -0.042      | 0.006         | -0.053, -0.031 | -0.011         | 0.002          | -0.015, -0.007 |                |
| 23                         | -0.044      | 0.006         | -0.057, -0.032 | -0.010         | 0.002          | -0.014, -0.006 |                |
| 24                         | -0.048      | 0.007         | -0.062, -0.034 | -0.006         | 0.002          | -0.01, -0.002  |                |
| 25                         | -0.046      | 0.008         | -0.061, -0.031 | -0.006         | 0.002          | -0.01, -0.002  |                |
| 26                         |             |               |                | 0.000          |                |                |                |
| 27                         |             |               |                | 0.012          | 0.001          | 0.010, 0.014   |                |
| 28                         |             |               |                | 0.035          | 0.002          | 0.031, 0.040   |                |
| 29                         |             |               |                | 0.061          | 0.004          | 0.053, 0.070   |                |
| 30                         |             |               |                | 0.066          | 0.006          | 0.055, 0.078   |                |
| N                          |             | 479,567       |                |                | 479,567        |                |                |

TABLE S18. Preceding Birth Interval: Robustness Checks Using Alternative Specifications of Birth Interval Variable.

|            |                   | GPA                          |                |               |                | Cognitive Ability |                |               |                |
|------------|-------------------|------------------------------|----------------|---------------|----------------|-------------------|----------------|---------------|----------------|
|            |                   | Between-family               |                | Within-family |                | Between-family    |                | Within-family |                |
|            |                   | Beta                         | 95% CI         | Beta          | 95% CI         | Beta              | 95% CI         | Beta          | 95% CI         |
| Binary     | 0-24 months (ref) | 0.000                        |                | 0.00          |                | 0.000             |                | 0.000         |                |
|            | >24 months        | -4.734                       | -5.227, -4.240 | -1.800        | -2.540, -1.058 | -0.238            | -0.272, -0.205 | -0.034        | -0.078, 0.009  |
| Binary     | 0-18 months (ref) | 0.000                        |                | 0.000         |                | 0.000             |                | 0.000         |                |
|            | >18 months        | -0.681                       | -1.459, 0.096  | -1.959        | -3.018, 0.899  | -0.119            | -0.166, -0.073 | -0.016        | -0.073, 0.042  |
| Continuous | Interval (months) | -0.254                       | -0.267, -0.241 | -0.016        | -0.036, 0.003  | -0.009            | -0.009, -0.008 | -0.001        | -0.002, 0.000  |
| Quadratic  | Interval (months) | -0.259                       | -0.296, -0.223 | -0.144        | -0.194, -0.095 | -0.016            | -0.019, -0.013 | -0.004        | -0.011, 0.003  |
|            | Interval squared  | 0.000                        | -0.000, 0.000  | 0.001         | 0.001, 0.001   | 0.000             | 0.000, 0.000   | 0.000         | -0.000, 0.000  |
|            |                   | Educational Attainment at 30 |                |               |                | Log income        |                |               |                |
|            |                   | Between-family               |                | Within-family |                | Between-family    |                | Within-family |                |
|            |                   | Beta                         | 95% CI         | Beta          | 95% CI         | Beta              | 95% CI         | Beta          | 95% CI         |
| Binary     | 0-24 months (ref) | 0.000                        |                | 0.000         |                | 0.000             |                | 0.000         |                |
|            | >24 months        | -0.231                       | -0.246, -0.215 | -0.047        | -0.065, -0.029 | -0.009            | -0.016, -0.002 | -0.014        | -0.024, -0.003 |
| Binary     | 0-18 months (ref) | 0.000                        |                | 0.000         |                | 0.000             |                | 0.000         |                |
|            | >18 months        | -0.125                       | -0.147, -0.104 | -0.023        | -0.048, 0.001  | 0.004             | -0.007, 0.014  | -0.015        | -0.029, -0.001 |
| Continuous | Interval (months) | -0.010                       | -0.010, -0.009 | 0.000         | -0.000, 0.001  | -0.001            | -0.001, -0.001 | 0.000         | -0.001, -0.000 |
| Quadratic  | Interval (months) | -0.013                       | -0.014, -0.012 | -0.003        | -0.004, -0.002 | -0.001            | -0.001, -0.000 | -0.001        | -0.001, -0.000 |
|            | Interval squared  | 0.000                        | 0.000, 0.000   | 0.000         | 0.000, 0.000   | 0.000             | -0.000, 0.000  | 0.000         | -0.000, 0.000  |
|            |                   | Social welfare               |                |               |                | Unemployment      |                |               |                |
|            |                   | Between-family               |                | Within-family |                | Between-family    |                | Within-family |                |
|            |                   | Beta                         | 95% CI         | Beta          | 95% CI         | Beta              | 95% CI         | Beta          | 95% CI         |
| Binary     | 0-24 months (ref) | 0.000                        |                | 0.000         |                | 0.000             |                | 0.000         |                |
|            | >24 months        | -0.001                       | -0.003, 0.001  | 0.001         | -0.002, 0.003  | 0.008             | 0.005, 0.011   | 0.001         | -0.003, 0.005  |
| Binary     | 0-18 months (ref) | 0.000                        |                | 0.000         |                | 0.000             |                | 0.000         |                |
|            | >18 months        | -0.006                       | -0.009, -0.003 | 0.001         | -0.002, 0.004  | 0.004             | -0.000, 0.010  | 0.004         | -0.002, 0.010  |
| Continuous | Interval (months) | 0.000                        | 0.000, 0.000   | -0.000        | -0.000, 0.000  | 0.000             | 0.000, 0.000   | 0.000         | -0.000, 0.000  |
| Quadratic  | Interval (months) | -0.000                       | -0.000, 0.000  | 0.000         | -0.000, 0.000  | 0.000             | 0.000, 0.001   | 0.000         | -0.000, 0.000  |
|            | Interval squared  | 0.000                        | 0.000, 0.000   | -0.000        | -0.000, 0.000  | -0.000            | -0.000, -0.000 | -0.000        | -0.000, -0.000 |

TABLE S19. Subsequent Birth Interval: Robustness Checks Using Alternative Specifications of Birth Interval Variable.

|            |                   | GPA                          |                |               |                | Cognitive Ability |                |               |                |
|------------|-------------------|------------------------------|----------------|---------------|----------------|-------------------|----------------|---------------|----------------|
|            |                   | Between-family               |                | Within-family |                | Between-family    |                | Within-family |                |
|            |                   | Beta                         | 95% CI         | Beta          | 95% CI         | Beta              | 95% CI         | Beta          | 95% CI         |
| Binary     | 0-24 months (ref) | 0.000                        |                | 0.000         |                | 0.000             |                | 0.000         |                |
|            | >24 months        | 1.374                        | 0.883, 1.865   | 1.553         | 0.857, 2.249   | 0.038             | 0.004, 0.072   | 0.019         | -0.026, 0.064  |
| Binary     | 0-18 months (ref) | 0.000                        |                | 0.000         |                | 0.000             |                | 0.000         |                |
|            | >18 months        | 4.947                        | 4.187, 5.708   | 0.623         | 0.340, 1.585   | 0.140             | 0.092, 0.188   | 0.009         | -0.051, 0.069  |
| Continuous | Interval (months) | -0.026                       | -0.038, -0.015 | -0.005        | -0.019, 0.009  | -0.000            | -0.001, 0.000  | 0.000         | -0.001, 0.000  |
| Quadratic  | Interval (months) | 0.066                        | 0.032, 0.099   | 0.071         | 0.029, 0.113   | 0.002             | 0.001, 0.003   | 0.001         | -0.001, 0.003  |
|            | Interval squared  | -0.001                       | -0.001, -0.001 | -0.001        | 0.001, 0.000   | -0.000            | -0.000, -0.000 | 0.000         | -0.000, -0.000 |
|            |                   | Educational Attainment at 30 |                |               |                | Log income        |                |               |                |
|            |                   | Between-family               |                | Within-family |                | Between-family    |                | Within-family |                |
|            |                   | Beta                         | 95% CI         | Beta          | 95% CI         | Beta              | 95% CI         | Beta          | 95% CI         |
| Binary     | 0-24 months (ref) | 0.000                        |                | 0.000         |                | 0.000             |                | 0.000         |                |
|            | >24 months        | 0.070                        | 0.054, 0.086   | 0.021         | 0.001, 0.041   | 0.022             | 0.014, 0.029   | 0.007         | -0.004, 0.018  |
| Binary     | 0-18 months (ref) | 0.000                        |                | 0.000         |                | 0.000             |                | 0.000         |                |
|            | >18 months        | 0.155                        | 0.133, 0.178   | 0.011         | -0.016, 0.037  | 0.029             | 0.019, 0.040   | -0.007        | -0.021, 0.008  |
| Continuous | Interval (months) | -0.001                       | -0.001, -0.001 | -0.001        | -0.001, -0.000 | 0.000             | -0.000, -0.000 | 0.000         | -0.000, 0.000  |
| Quadratic  | Interval (months) | 0.001                        | 0.001, 0.002   | 0.000         | -0.001, 0.001  | 0.001             | 0.000, 0.001   | 0.000         | -0.000, 0.000  |
|            | Interval squared  | 0.000                        | -0.000, -0.000 | -0.000        | -0.000, 0.000  | 0.000             | -0.000, -0.000 | 0.000         | -0.000, 0.000  |
|            |                   | Social welfare               |                |               |                | Unemployment      |                |               |                |
|            |                   | Between-family               |                | Within-family |                | Between-family    |                | Within-family |                |
|            |                   | Beta                         | 95% CI         | Beta          | 95% CI         | Beta              | 95% CI         | Beta          | 95% CI         |
| Binary     | 0-24 months (ref) | 0.000                        |                | 0.000         |                | 0.000             |                | 0.000         |                |
|            | >24 months        | -0.008                       | -0.010, -0.007 | -0.002        | -0.005, 0.000  | -0.001            | -0.004, 0.002  | 0.002         | -0.003, 0.007  |
| Binary     | 0-18 months (ref) | 0.000                        |                | 0.000         |                | 0.000             |                | 0.000         |                |
|            | >18 months        | -0.014                       | -0.017, -0.011 | -0.001        | -0.004, 0.003  | -0.005            | -0.009, 0.000  | -0.004        | -0.002, -0.010 |
| Continuous | Interval (months) | -0.000                       | -0.000, 0.000  | 0.000         | -0.000, 0.000  | 0.000             | 0.000, 0.000   | 0.000         | -0.000, 0.000  |
| Quadratic  | Interval (months) | -0.000                       | -0.000, -0.000 | -0.000        | -0.000, 0.000  | 0.000             | -0.000, 0.000  | 0.000         | -0.000, 0.000  |
|            | Interval squared  | 0.000                        | 0.000, 0.000   | 0.000         | -0.000, 0.000  | 0.000             | -0.000, 0.000  | -0.000        | -0.000, 0.000  |

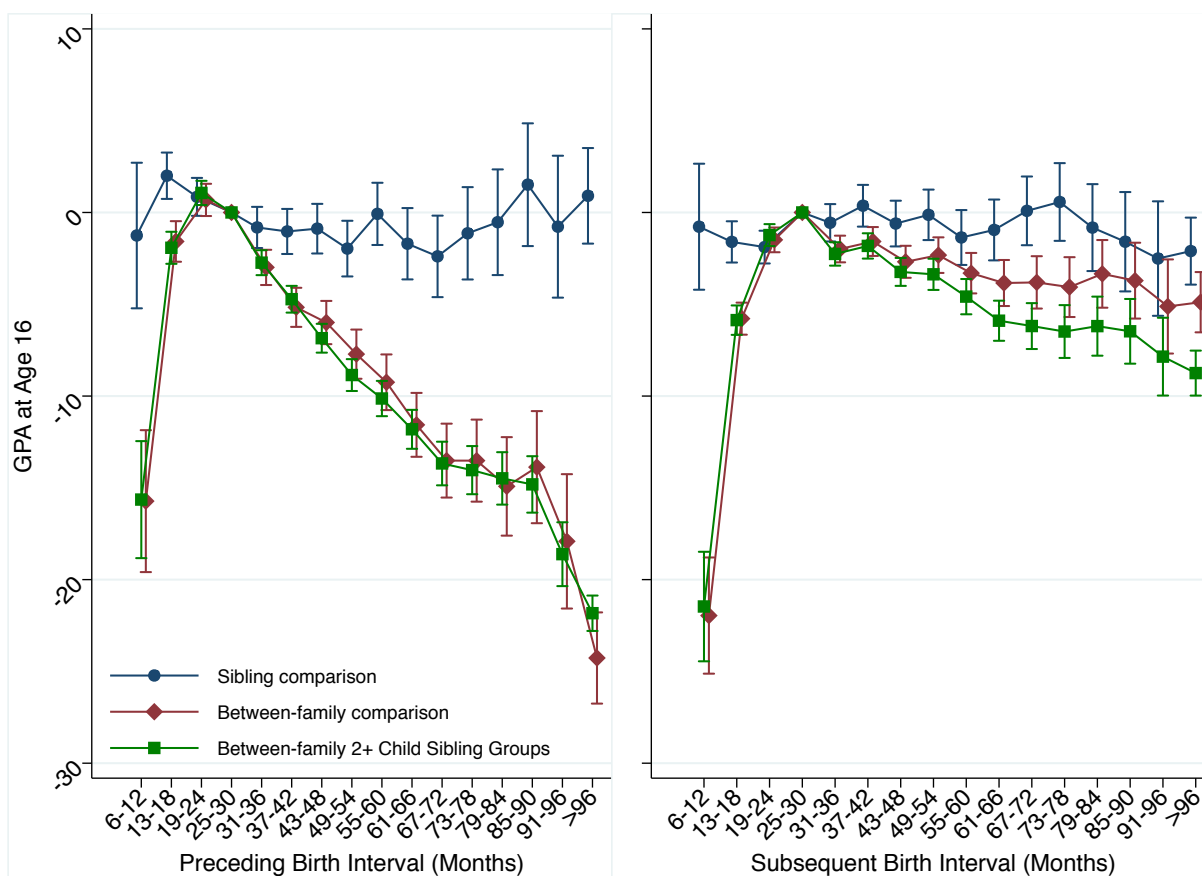

FIGURE S1. Swedish men and women born 1982 to 1991, grade point average at age 16 by preceding and subsequent birth intervals. The main analysis population for examining preceding birth intervals consists of individuals in sibling groups with at least three children, excluding the first born. The main analysis population for examining subsequent birth intervals consists of individuals in sibling groups with at least three children, excluding the last born. We also show the results from between-family analyses that include sibling groups with two or more children, excluding the first born for the analysis of preceding intervals, and excluding the last born for the analysis of subsequent intervals. Error bars are 95% confidence intervals.

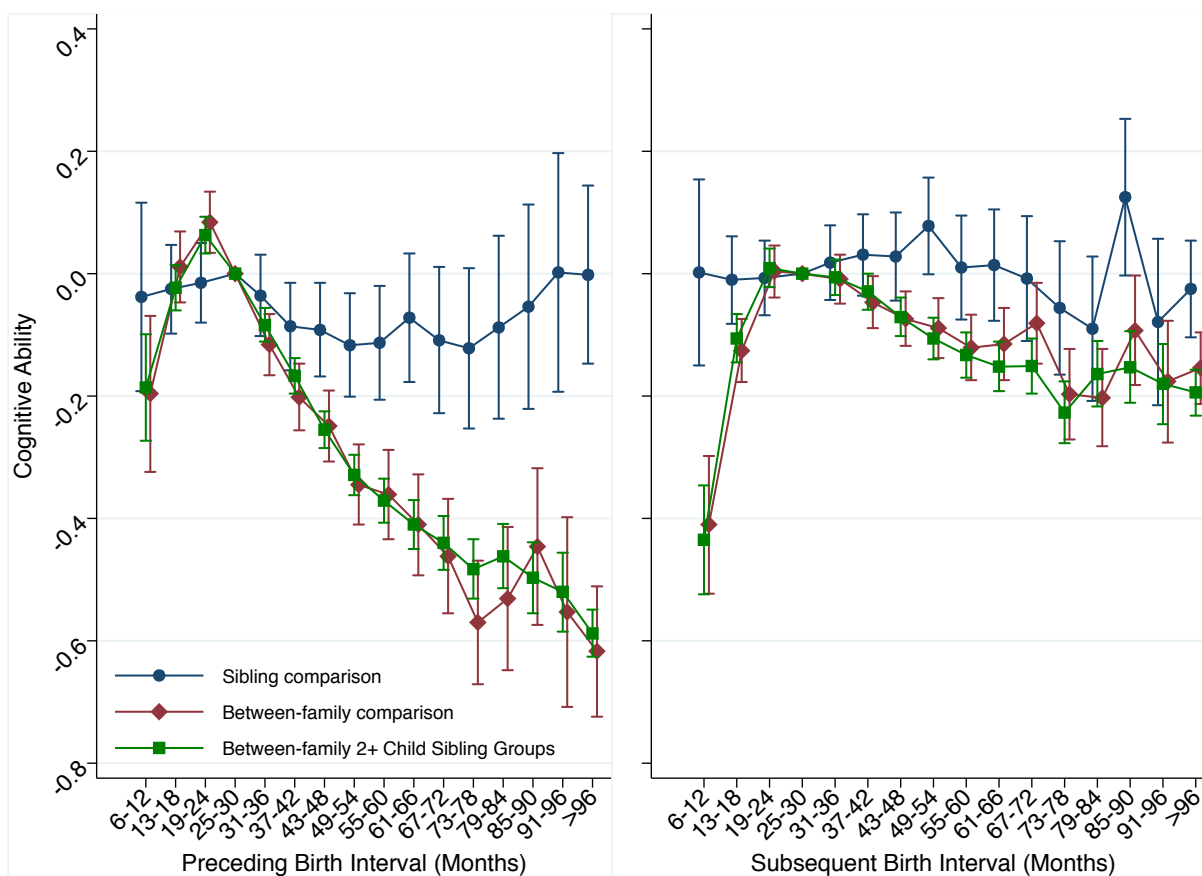

FIGURE S2. Swedish men born 1965 to 1977, cognitive ability at ages 17 to 20 by preceding and subsequent birth intervals. The analysis population for examining preceding birth intervals consists of individuals in sibling groups with at least three children, excluding the first born. The analysis population for examining subsequent birth intervals consists of individuals in sibling groups with at least three children, excluding the last born. We also show the results from between-family analyses that include sibling groups with two or more children, excluding the first born for the analysis of preceding intervals, and excluding the last born for the analysis of subsequent intervals. Error bars are 95% confidence intervals.

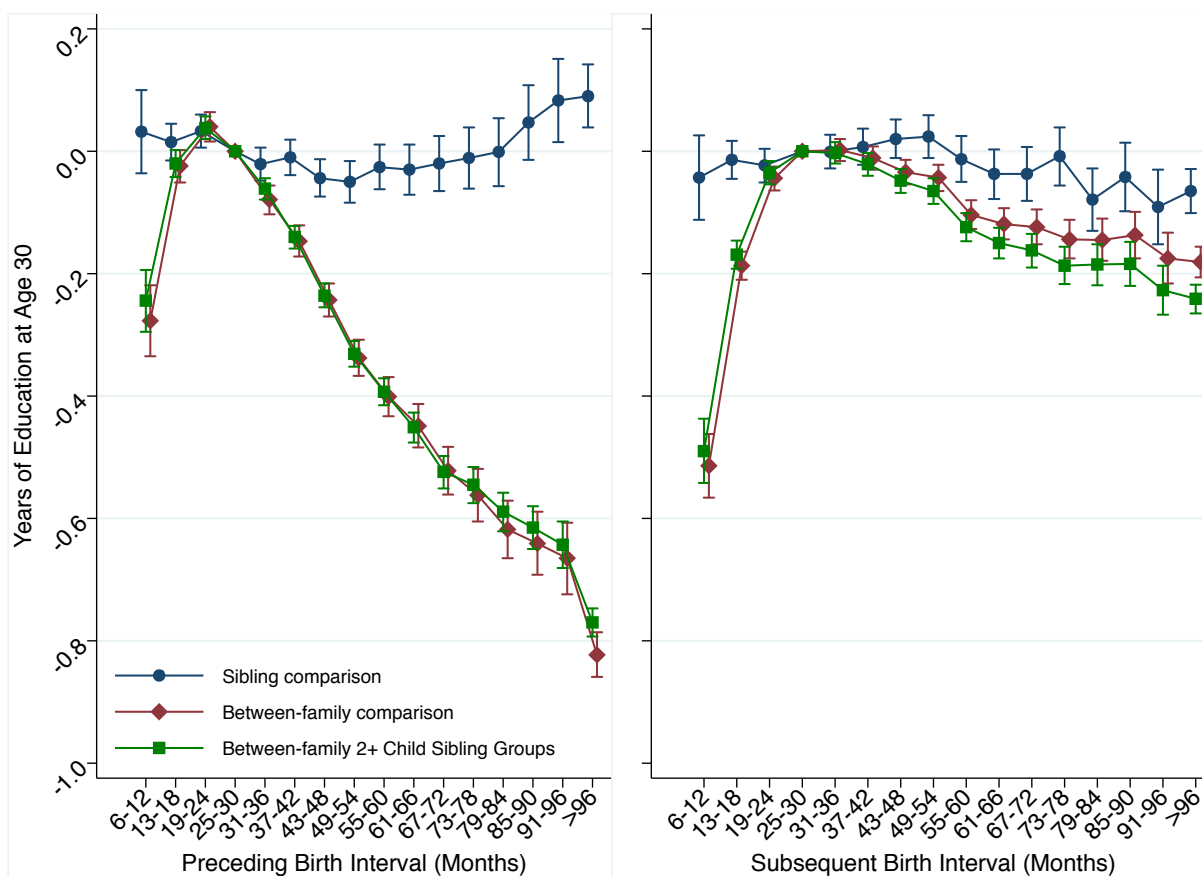

FIGURE S3. Swedish men and women born 1960 to 1981, years of education by age 30 by preceding and subsequent birth intervals. The analysis population for examining preceding birth intervals consists of individuals in sibling groups with at least three children, excluding the first born. The analysis population for examining subsequent birth intervals consists of individuals in sibling groups with at least three children, excluding the last born. We also show the results from between-family analyses that include sibling groups with two or more children, excluding the first born for the analysis of preceding intervals, and excluding the last born for the analysis of subsequent intervals. Error bars are 95% confidence intervals.

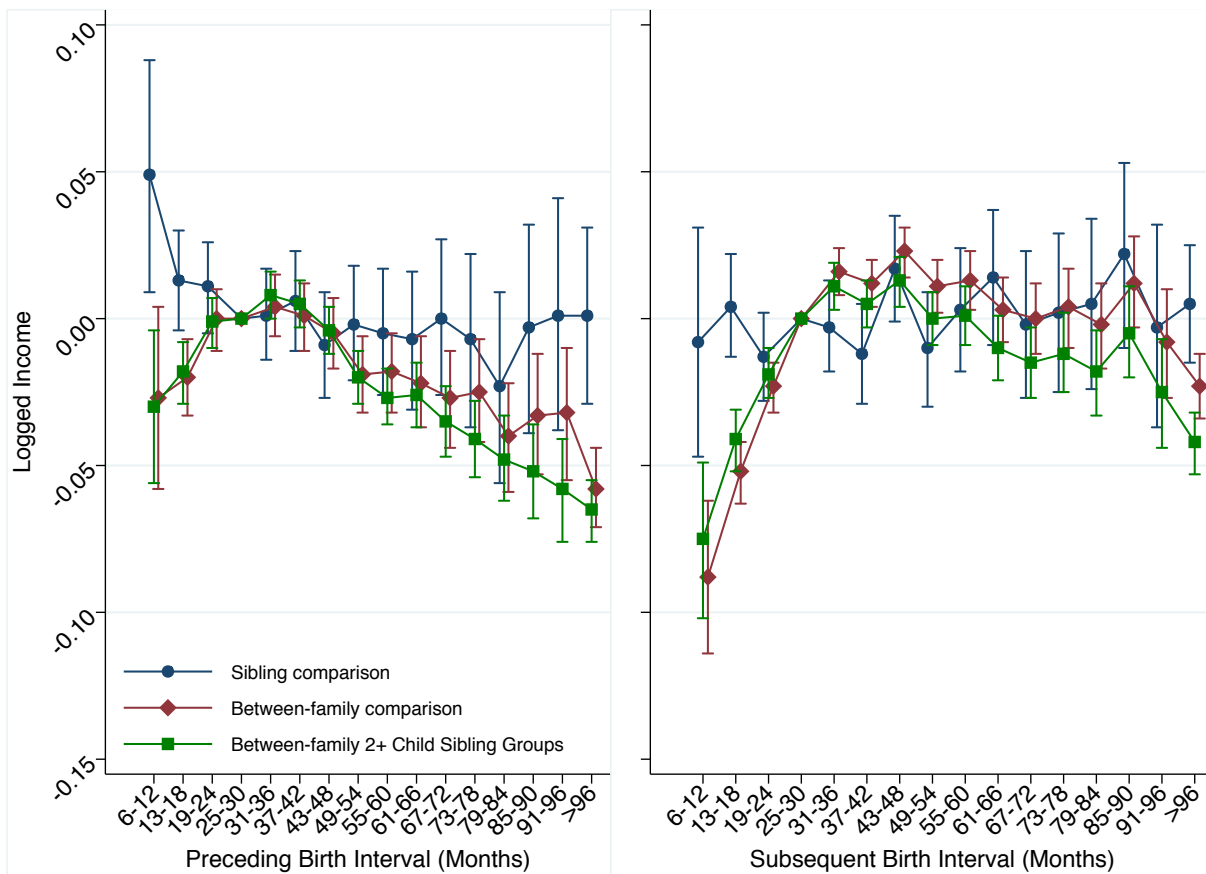

FIGURE S4. Swedish men born 1960 to 1981, logged average income over ages 29 to 31 by preceding and subsequent birth intervals. The analysis population for examining preceding birth intervals consists of individuals in sibling groups with at least three children, excluding the first born. The analysis population for examining subsequent birth intervals consists of individuals in sibling groups with at least three children, excluding the last born. We also show the results from between-family analyses that include sibling groups with two or more children, excluding the first born for the analysis of preceding intervals, and excluding the last born for the analysis of subsequent intervals. Error bars are 95% confidence intervals.

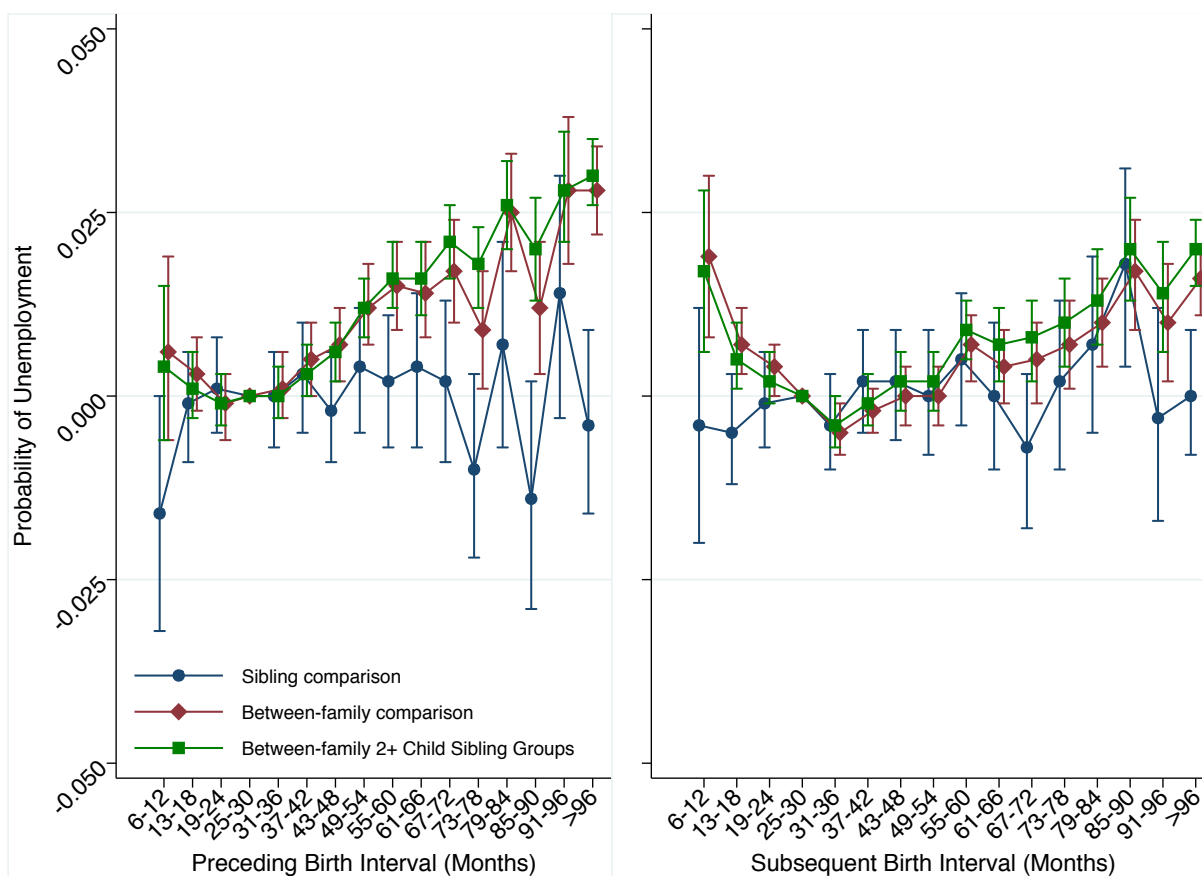

FIGURE S5. Swedish men born 1960 to 1981, predicted probability of unemployment over ages 29 to 31 by preceding and subsequent birth intervals. The analysis population for examining preceding birth intervals consists of individuals in sibling groups with at least three children, excluding the first born. The analysis population for examining subsequent birth intervals consists of individuals in sibling groups with at least three children, excluding the last born. We also show the results from between-family analyses that include sibling groups with two or more children, excluding the first born for the analysis of preceding intervals, and excluding the last born for the analysis of subsequent intervals. Error bars are 95% confidence intervals.



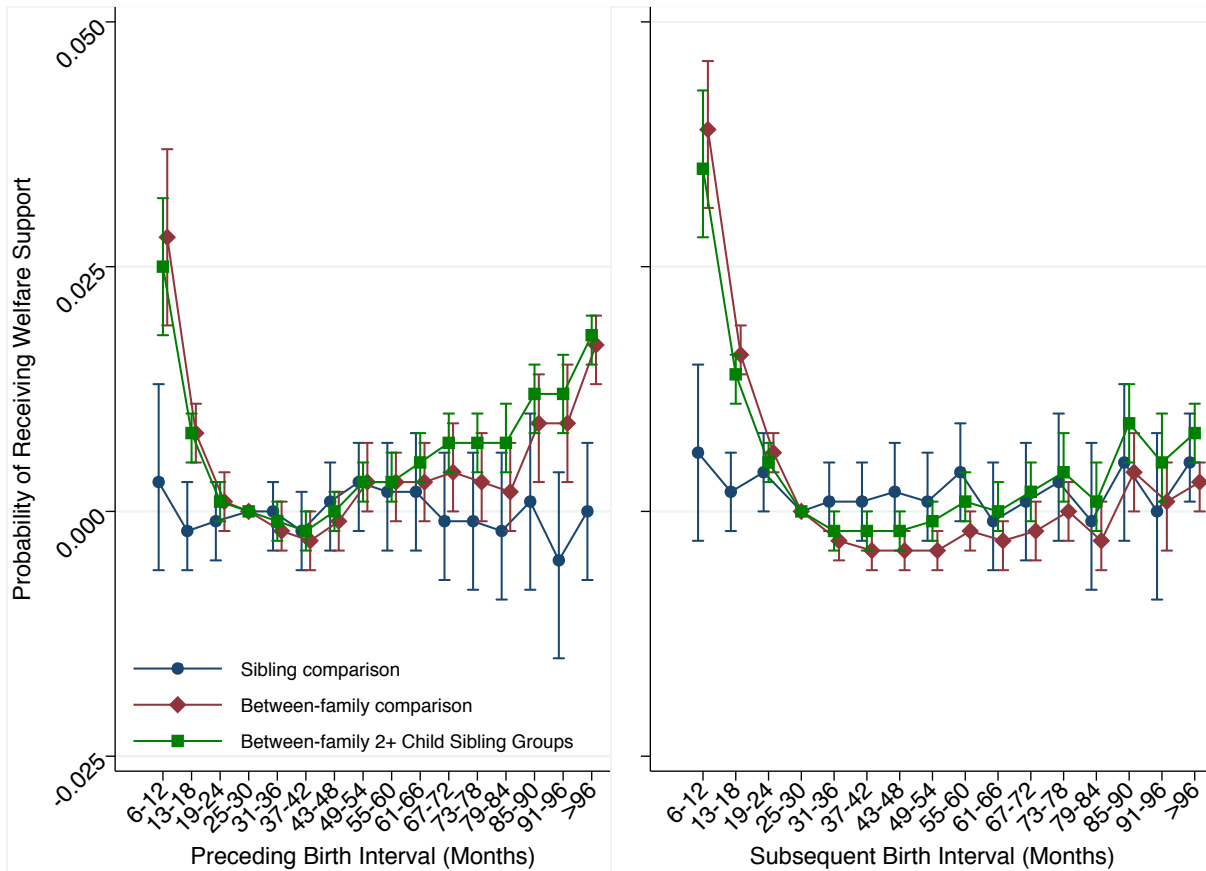

FIGURE S6. Swedish men born 1960 to 1981, predicted probability of receiving welfare support over ages 29 to 31 by preceding and subsequent birth intervals. The analysis population for examining preceding birth intervals consists of individuals in sibling groups with at least three children, excluding the first born. The analysis population for examining subsequent birth intervals consists of individuals in sibling groups with at least three children, excluding the last born. We also show the results from between-family analyses that include sibling groups with two or more children, excluding the first born for the analysis of preceding intervals, and excluding the last born for the analysis of subsequent intervals. Error bars are 95% confidence intervals.
